# Supplementary material for: Comparative analysis of spike-specific IgG Fc glycoprofiles elicited by adenoviral, mRNA, and protein-based SARS-CoV-2 vaccines
Source: PubMed Central journal article supplement — iScience. 2023 Aug 14;26(9):107619. doi: 10.1016/j.isci.2023.107619 (PMC10475480; doi:10.1016/j.isci.2023.107619), 2023-08-14
Supplement: mmc1.pdf [file mmc1.pdf]

## **Supplemental information**

### **Comparative analysis of spike-specific IgG Fc glycoprofiles elicited by adenoviral, mRNA, and protein-based SARS-CoV-2 vaccines**

**Julie Van Coillie, Tamas Pongracz, Tonći Šuštić, Wenjun Wang, Jan Nouta, Mathieu Le Gars, Sofie Keijzer, Federica Linty, Olvi Cristianawati, Jim B.D. Keijser, Remco Visser, Lonneke A. van Vught, Marleen A. Slim, Niels van Mourik, Merel J. Smit, Adam Sander, David E. Schmidt, Maurice Steenhuis, Theo Rispens, Morten A. Nielsen, Benjamin G. Mordmüller, Alexander P.J. Vlaar, C. Ellen van der Schoot, Ramon Roozendaal, Manfred Wuhrer, Gestur Vidarsson, in collaboration with the UMC COVID-19 S3/HCW study group, Fatebenefratelli-Sacco Infectious Diseases Physicians group, and Radboud University Medical Center (RUMC) and COUGH1 study group**

| <b>Supplemental Figures</b> |                                                                                                                                                     |
|-----------------------------|-----------------------------------------------------------------------------------------------------------------------------------------------------|
| Supplementary Figure 1      | Anti-N levels in the study cohorts, Related to Figure 1 and Table 1                                                                                 |
| Supplementary Figure 2      | Pre-outbreak threshold, Related to Figure 2a                                                                                                        |
| Supplementary Figure 3      | Anti-Spike IgG levels and Fc glycosylation for the Janssen cohort, Related to Figure 2                                                              |
| Supplementary Figure 4      | Comparison of anti-S IgG levels within and between cohorts at seroconversion and 2 weeks post-booster, Related to Figure 2b-e                       |
| Supplementary Figure 5      | Anti-Spike IgG levels and Fc glycosylation for the RUMC/COUGH1 cohort, Related to Figure 2                                                          |
| Supplementary Figure 6      | Comparison of anti-Spike IgG1 Fc glycosylation traits within and between cohorts at seroconversion and 2 weeks post-booster, Related to Figure 2b-e |
| Supplementary Figure 7      | Comparison of anti-Spike IgG1 Fc glycosylation traits within cohorts at second dose and two weeks thereafter, Related to figure 2b-e                |
| Supplementary Figure 8      | Comparison of anti-Spike and total IgG1 Fc glycosylation traits, Related to figure 2b-e and 3                                                       |
| <b>Supplemental Tables</b>  |                                                                                                                                                     |
| Supplementary Table 1       | Detailed description of cohort 1 – Pfizer, Related to Figure 1-4, S1, S4, S6-8                                                                      |
| Supplementary Table 2       | Detailed description of Cohort 2 – Moderna, Related to Figure 1-4, S1, S4, S6-8                                                                     |
| Supplementary Table 3       | Detailed description of Cohort 3 – Janssen, Related to Figure 1-4, S1, S3-4, S6-8                                                                   |
| Supplementary Table 4       | Detailed description of Cohort 4 – AstraZeneca, Related to Figure 1-4, S1, S4, S6-8                                                                 |
| Supplementary Table 5       | Detailed description of Cohort 5 - RUMC/BN, Related to Figure 1-4, S1, S4-5, S6-8                                                                   |
| Supplementary Table 6       | Age comparison with ANOVA ( $p=3.23E-11$ ) with Tukey's test, Related to Figure 1 and Table 1                                                       |
| Supplementary Table 7       | Correlations between age and total IgG1 Fc glycosylation and levels in a sex stratified manner, Related to Figure 1 and Table 1                     |
| Supplementary Table 8       | Correlations between age and anti-S IgG1 Fc glycosylation and levels in a sex stratified manner, Related to Figure 1 and Table 1                    |
| Supplementary Table 9       | IgG1 glycopeptides included in the final analyte list, Related to Figure 1-4, S3-8                                                                  |
| Supplementary Table 10      | Description and calculation of IgG glycosylation derived traits, Related to Figure 1-4, S3-8                                                        |

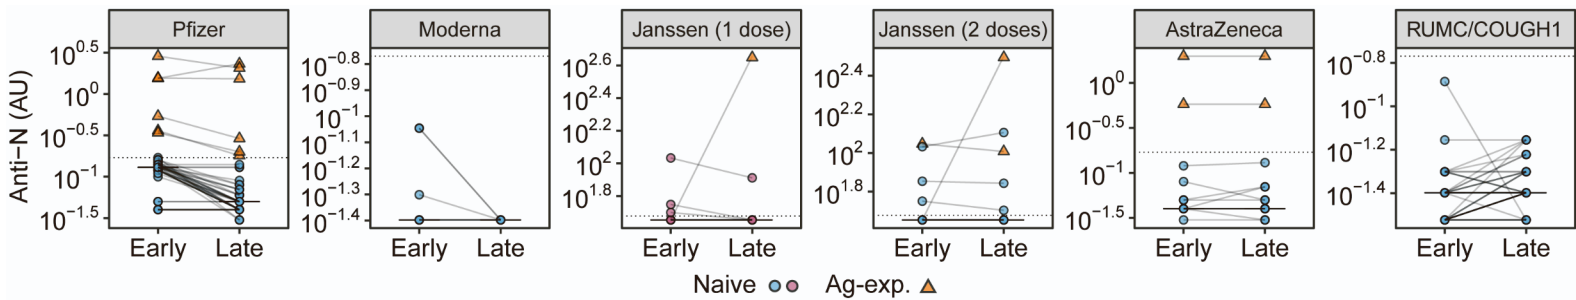

**Figure S1. Anti-N levels in the study cohorts.**

Anti-N levels at the first and last time point for Pfizer (n=39), Moderna (n=8), one (purple, n=39) or two (blue, n=39) doses Janssen (n=78), AstraZeneca (n=17), and RUMC/COUGH1 (n=45) for naive (blue and purple circle) and antigen-experienced (orange triangle) vaccinees, respectively. Anti-N levels for Janssen are expressed in ABU/mL. Total anti-N levels for the other cohorts are expressed in normalised OD (nOD) (Vogelzang et al., 2020) and the horizontal dotted line signifies the threshold, as previously determined (Vogelzang et al., 2020; Wieske et al., 2022). Anti-N levels for Janssen are therefore not comparable with the other cohorts.

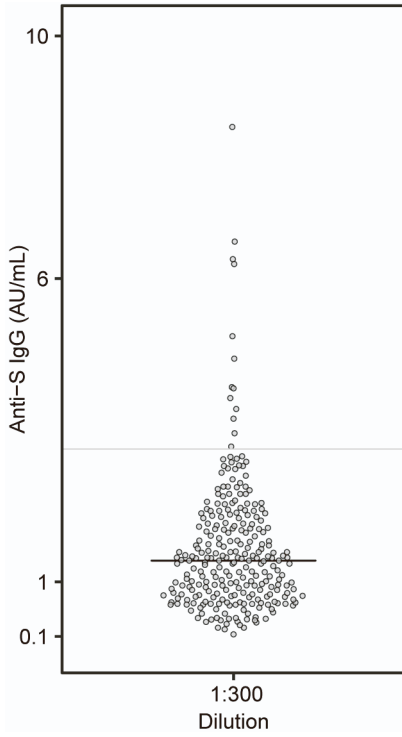

**Figure S2. Pre-outbreak threshold.**

The anti-S IgG levels of 264 pre-pandemic samples were determined at a 1:300 dilution. The pre-outbreak threshold of 6 AU/ml for seropositivity was determined based on the 95<sup>th</sup> percentile of these samples (grey line). Black line indicates median.

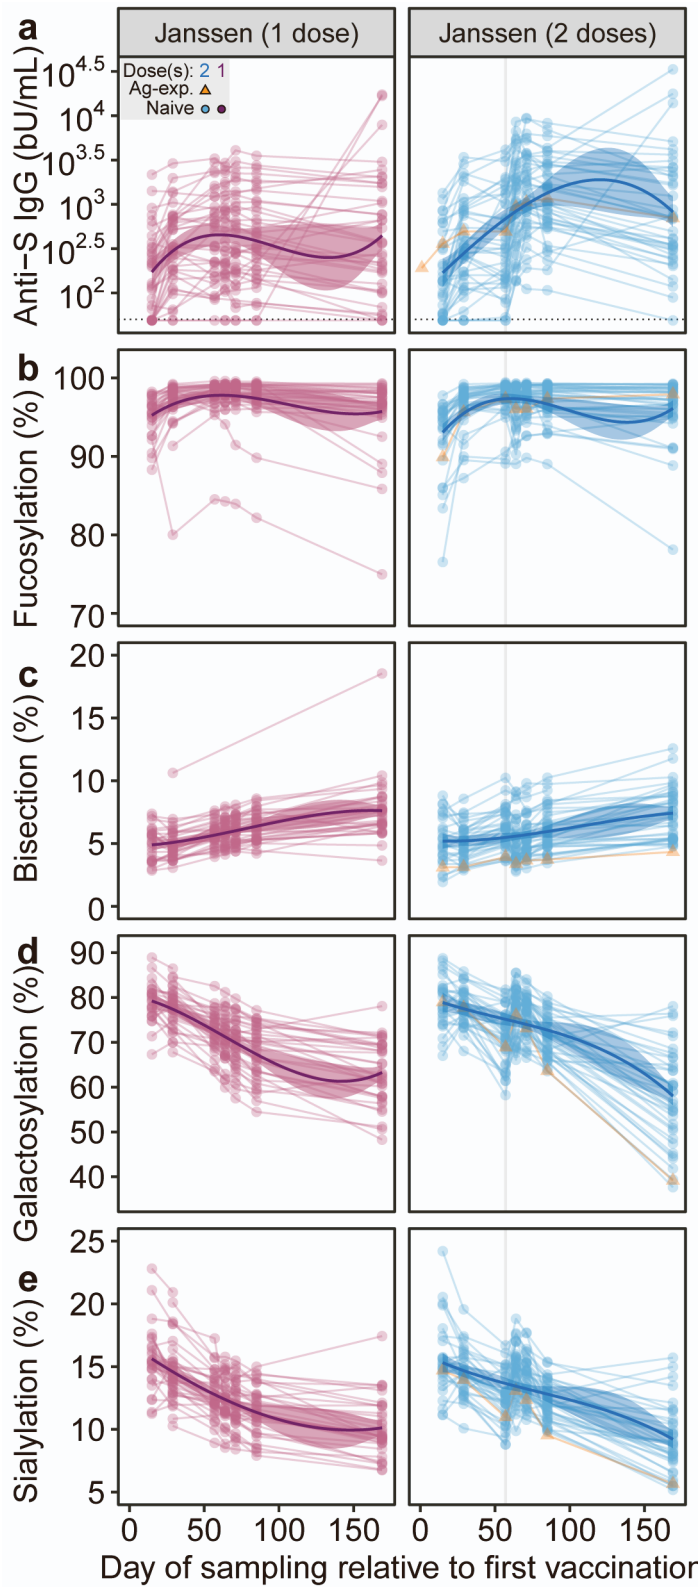

**Figure S3. Anti-Spike IgG levels and Fc glycosylation for the Janssen cohort.**

**a** Janssen longitudinal anti-S IgG levels in ABU/mL. IgG1 Fc **b** fucosylation, **c** bisection, **d** galactosylation, and **e** sialylation for individuals vaccinated with one (purple, n=39) or two (blue, n=39) doses for naive (circle) and antigen-experienced (triangle) vaccinees, respectively. Timing of the second vaccine dose is depicted vertically in grey. LC-MS data are shown for positive anti-S ELISA measurements.

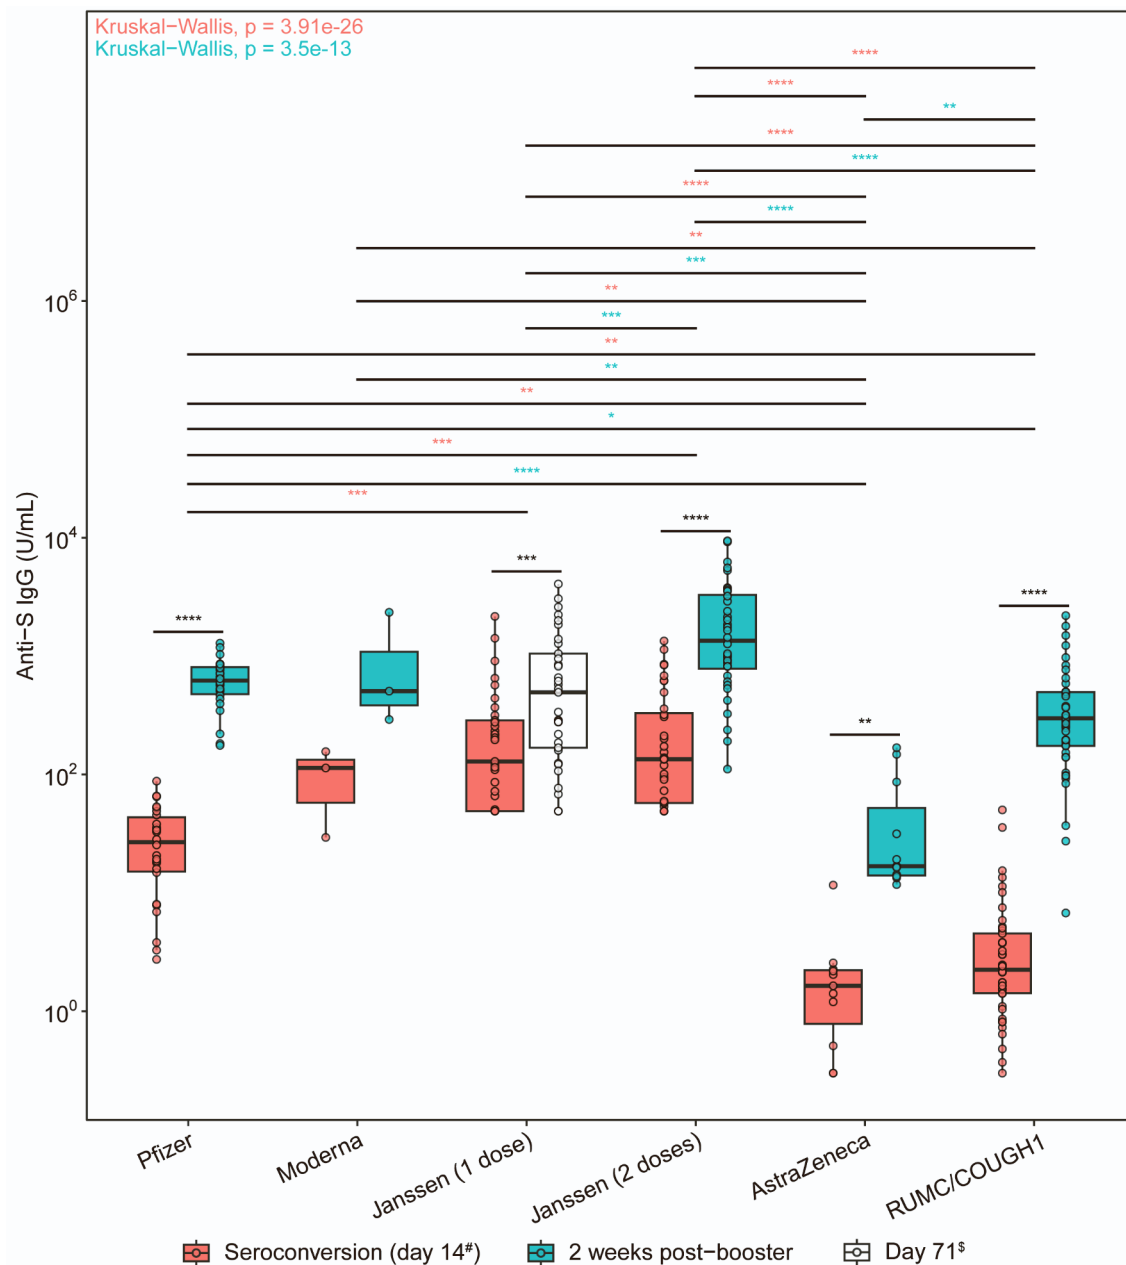

**Figure S4. Comparison of anti-S IgG levels within and between cohorts at seroconversion and 2 weeks post-booster.**

Anti-S IgG levels around two weeks after the 1<sup>st</sup> (red) and 2<sup>nd</sup> (cyan, transparent) dose for Pfizer (n=39), Moderna (n=8), one (red and cyan, n=39) or two (red and transparent, n=39) doses Janssen, AstraZeneca (n=17), and RUMC/COUGH1 (n=45), as assessed by Kruskal-Wallis tests. Dunn's test was used to assess differences between cohorts in case of a significant Kruskal-Wallis test. Comparisons between two matched samples (within cohorts) were carried out with a Wilcoxon signed-rank test. Asterisks indicate the degree of significance as follows: \*, \*\*, \*\*\*, \*\*\*\*:  $p$ -value < 0.05, 0.01, 0.001, 0.0001, respectively. <sup>#</sup>Day 15 for the Janssen cohort. <sup>§</sup>Day 71 for one dose of the Janssen cohort as no booster was administered. Shown are only the naive vaccinees.

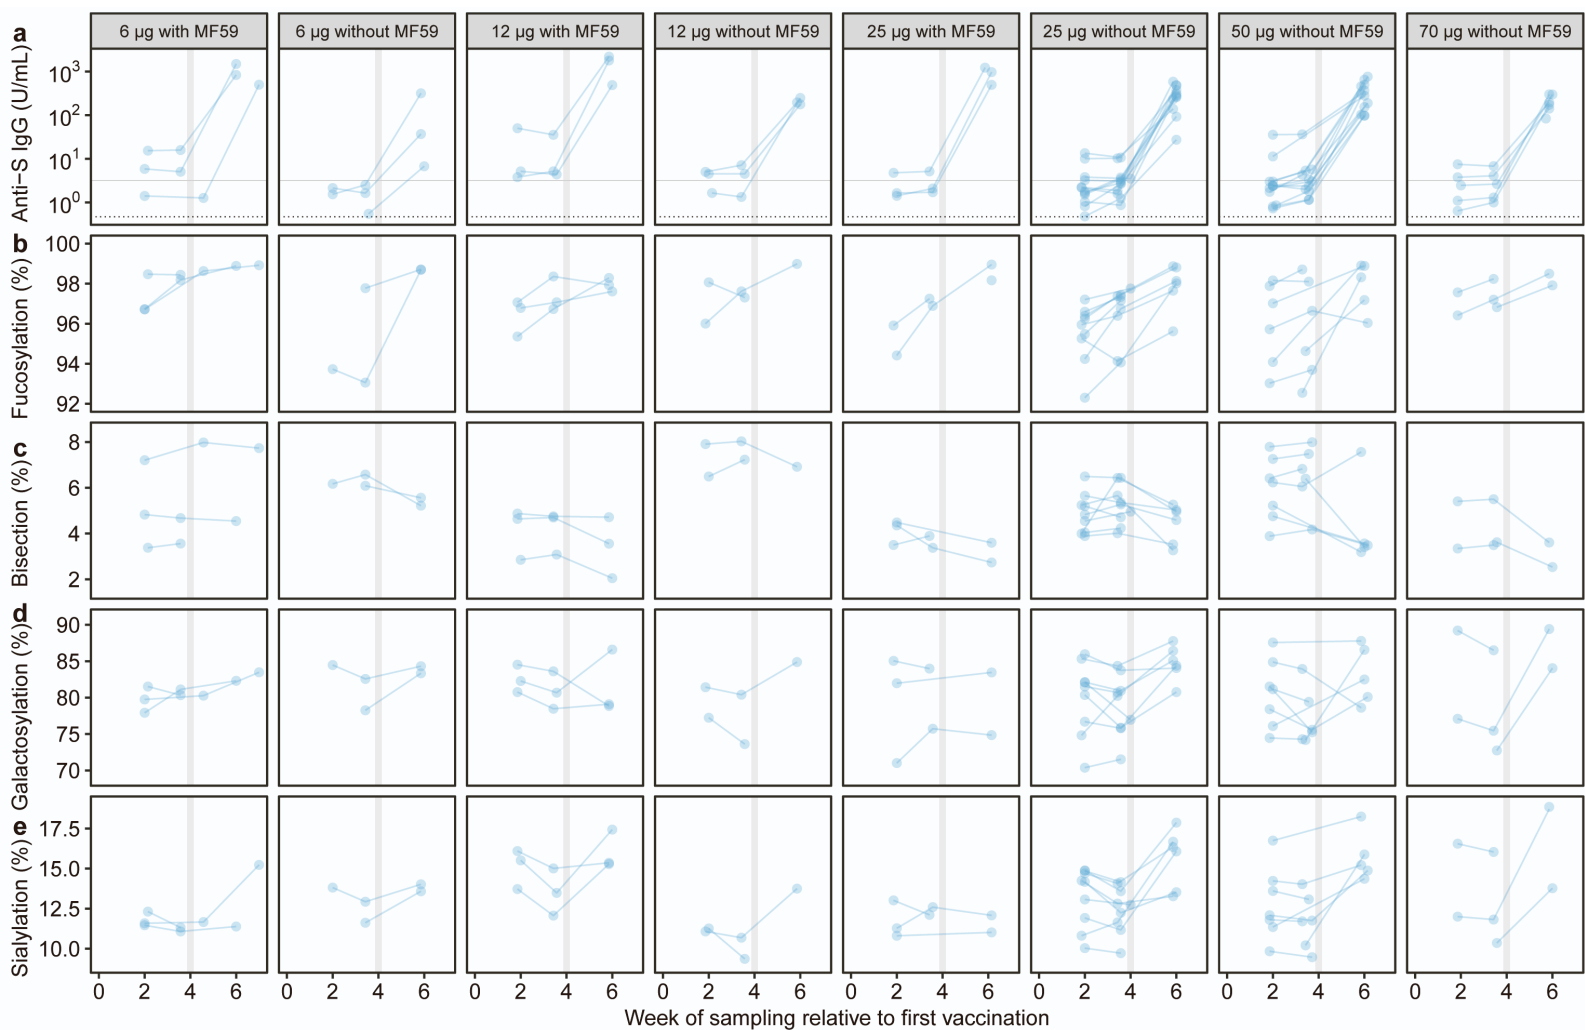

**Figure S5. Anti-Spike IgG levels and Fc glycosylation for the RUMC/COUGH1 cohort.**

**a** Longitudinal anti-S IgG levels. IgG1 Fc **b** fucosylation, **c** bisection, **d** galactosylation, and **e** sialylation for the different regimens of the RUMC/COUGH1 cohort (n=45). Timing of the second vaccine dose is depicted vertically in grey.

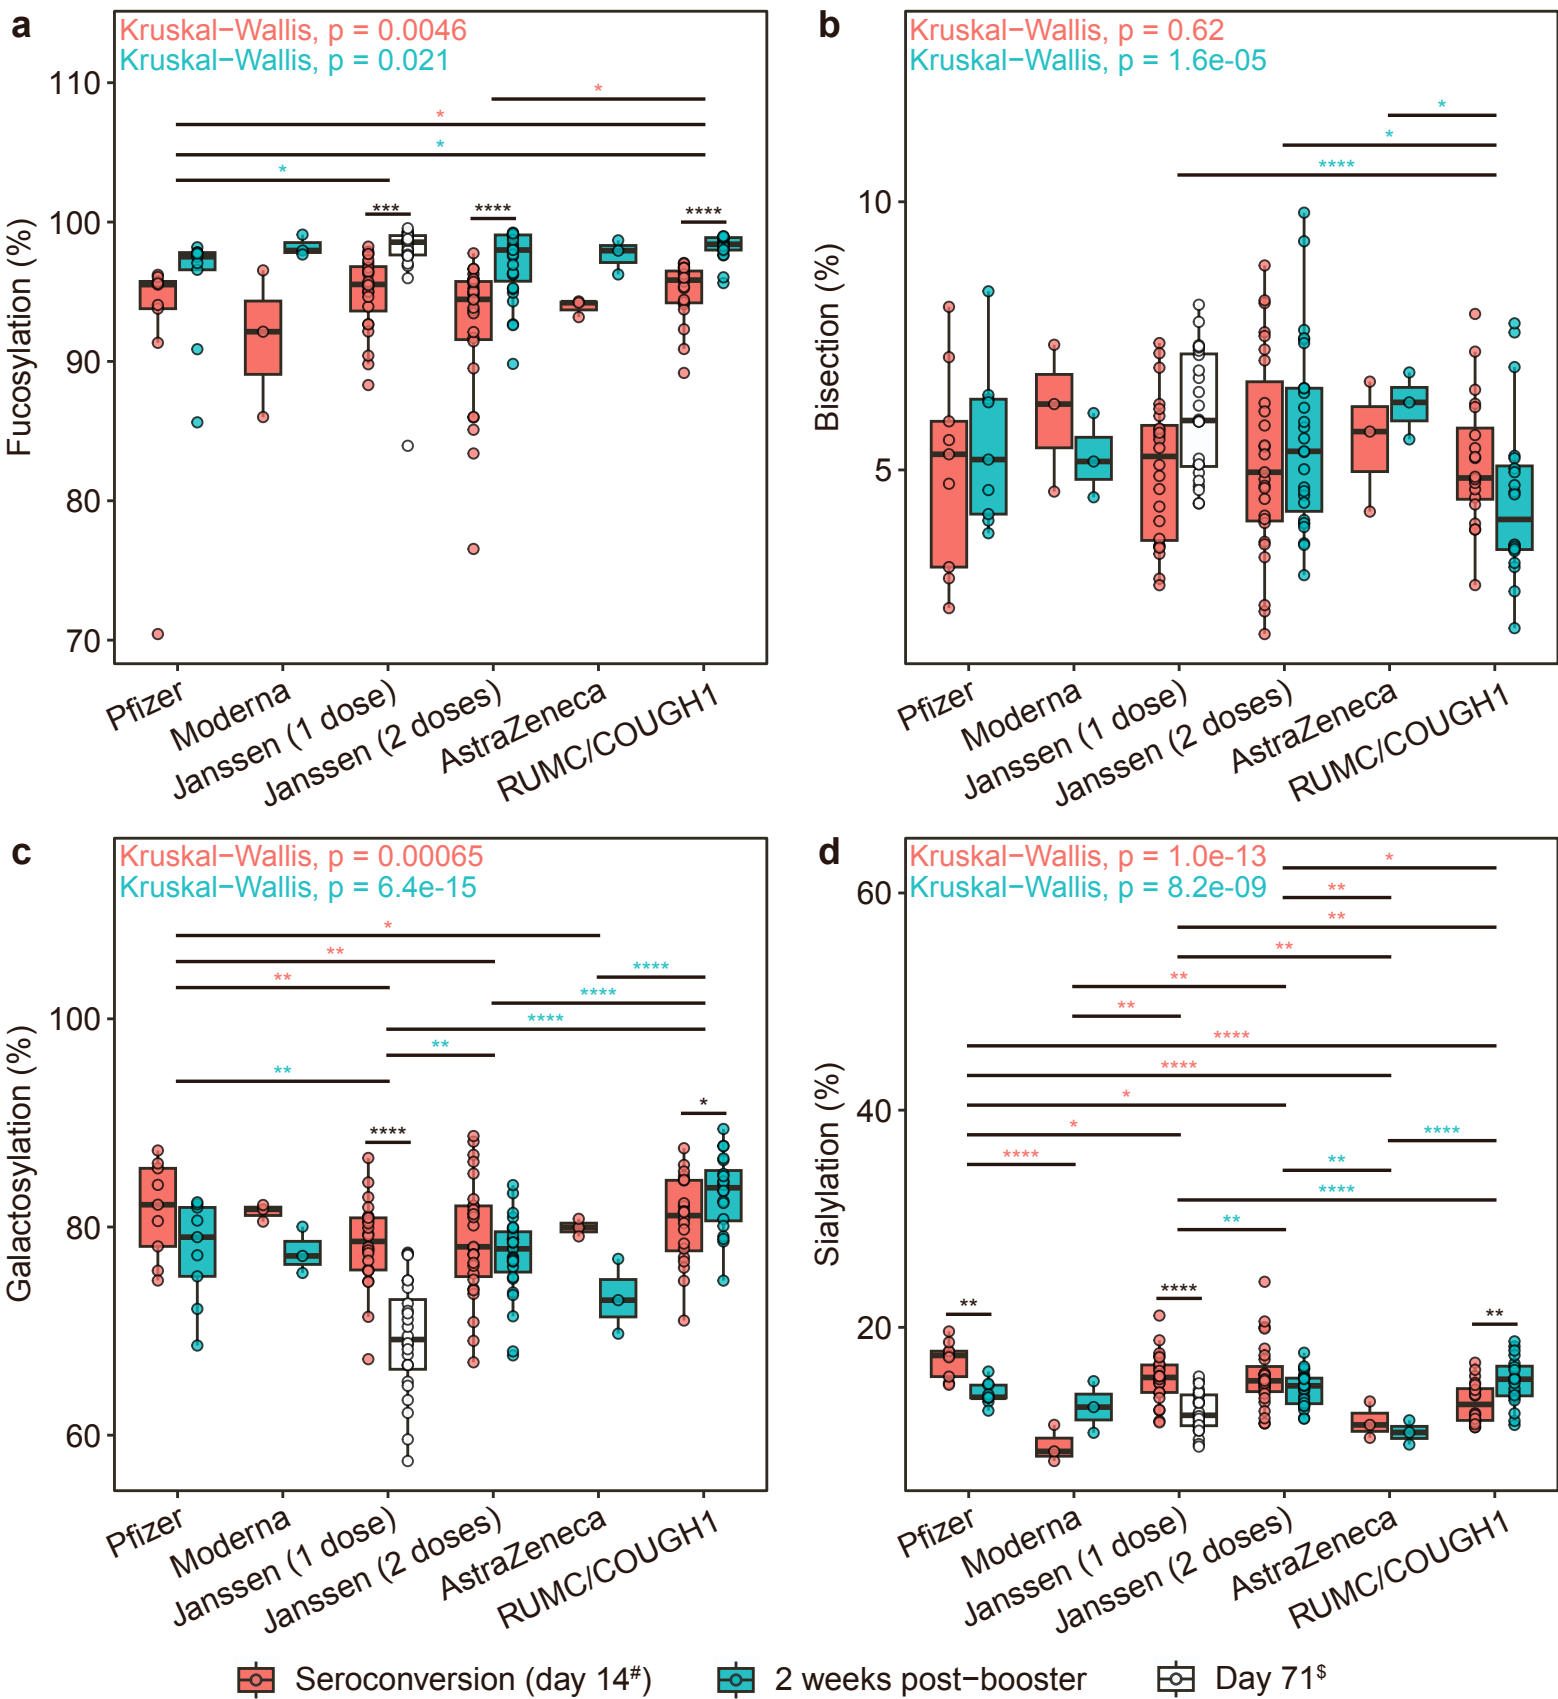

**Figure S6. Comparison of anti-Spike IgG1 Fc glycosylation traits within and between cohorts at seroconversion and 2 weeks post-booster.**

Anti-S IgG1 **a** fucosylation, **b** bisection, **c** galactosylation, and **d** sialylation around two weeks after the 1<sup>st</sup> (red) and 2<sup>nd</sup> dose (cyan, transparent) dose for Pfizer ( $n=39$ ), Moderna ( $n=8$ ), one (red and cyan,  $n=39$ ) or two (red and transparent,  $n=39$ ) doses Janssen, AstraZeneca ( $n=17$ ), and RUMC/COUGH1 ( $n=45$ ), as assessed by Kruskal-Wallis tests. Dunn's test was used to assess differences between cohorts in case of a significant Kruskal-Wallis test. Comparisons between two matched samples (within cohorts) were carried out with a Wilcoxon signed-rank test. Asterisks indicate the degree of significance as follows: \*, \*\*, \*\*\*, \*\*\*\*:  $p$ -value  $< 0.05, 0.01, 0.001, 0.0001$ , respectively. <sup>#</sup>Day 15 for the Janssen cohort. <sup>\$</sup>Day 71 for one dose of the Janssen cohort as no booster was administered. Only naive vaccinees are shown.



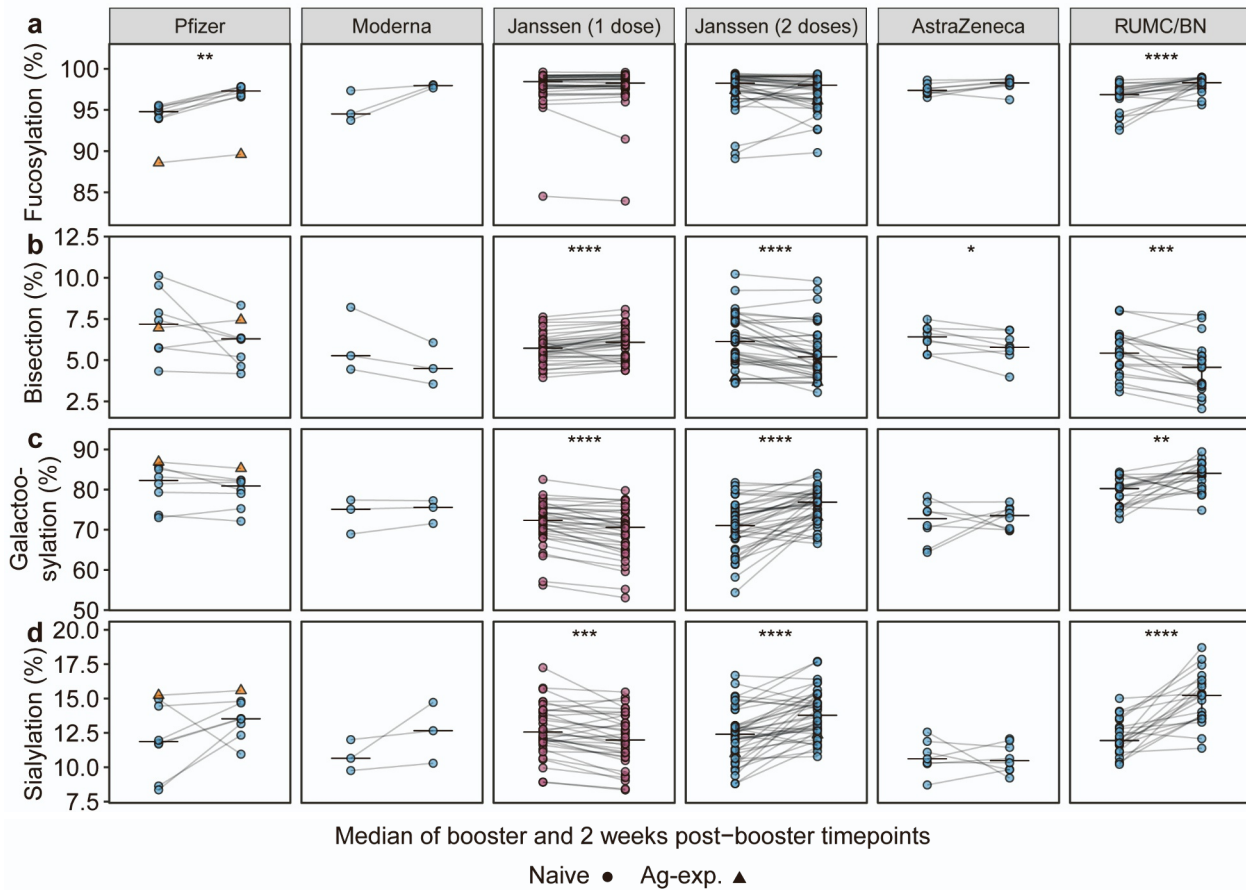

**Figure S7. Comparison of anti-Spike IgG1 Fc glycosylation traits within cohorts at second dose and two weeks thereafter.**

Anti-S IgG1 **a** fucosylation, **b** bisection, **c** galactosylation, and **d** sialylation at the day of 2<sup>nd</sup> dose and two weeks thereafter for Pfizer (n=8), Moderna (n=3), Janssen (n=74), AstraZeneca (n=8), and RUMC/COUGH1 (n=20), as assessed by Wilcoxon signed-rank test. Asterisks indicate the degree of significance as follows: \*, \*\*, \*\*\*, \*\*\*\*: *p*-value < 0.05, 0.01, 0.001, 0.0001, respectively.

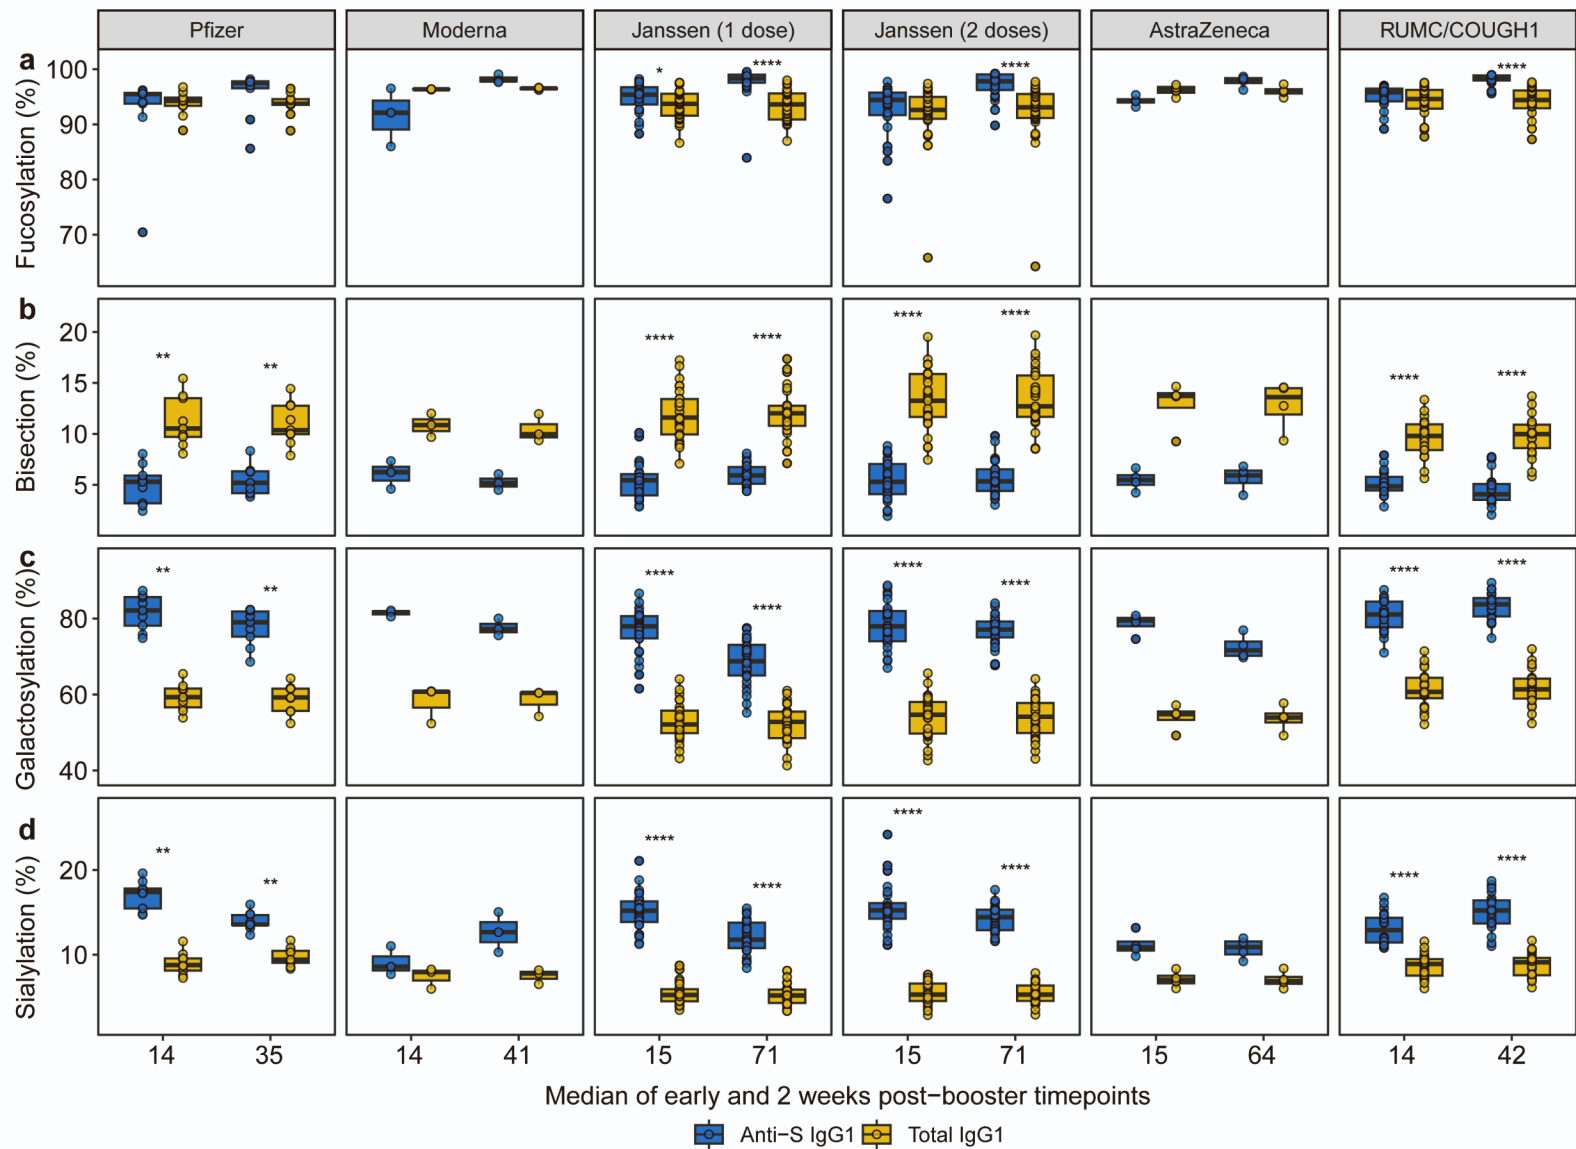

**Figure S8. Comparison of anti-Spike and total IgG1 Fc glycosylation traits**

**a** Fucosylation, **b** bisection, **c** galactosylation, and **d** sialylation for anti-S (blue) and total (yellow) IgG1 Fc around two weeks after the 1<sup>st</sup> and 2<sup>nd</sup> dose, as indicated by the median day on the x-axis, for Pfizer (n=39), Moderna (n=8), one or two doses Janssen, AstraZeneca (n=17). The comparisons between two matched samples at both timepoints were carried out with a Wilcoxon signed-rank tests. Asterisks indicate the degree of significance as follows: \*, \*\*, \*\*\*, \*\*\*\*: *p*-value < 0.05, 0.01, 0.001, 0.0001, respectively. Shown are only the naive vaccinees.

## Supporting information

### Adenoviral, mRNA, and protein-based SARS-CoV-2 vaccines elicit similar spike-specific IgG Fc glycoprofiles

Julie Van Coillie<sup>1,2,†</sup>, Tamas Pongracz<sup>3,†</sup>, Tonći Šuštić<sup>1,2</sup>, Wenjun Wang<sup>3</sup>, Jan Nouta<sup>3</sup>, Sofie Keijzer<sup>4</sup>, Federica Linty<sup>1,2</sup>, Olvi Cristianawati<sup>4</sup>, Jim B. D. Keijser<sup>4</sup>, Remco Visser<sup>1,2</sup>, Lonneke A. van Vught<sup>5,6</sup>, Marleen A. Slim<sup>5,6</sup>, Niels van Mourik<sup>5,6</sup>, Merel J. Smit<sup>7</sup>, Adam Sander<sup>8</sup>, David Schmidt<sup>1</sup>, Maurice Steenhuis<sup>4</sup>, Theo Rispens<sup>4</sup>, Morten A. Nielsen<sup>8</sup>, Benjamin G. Mordmüller<sup>7</sup>, Alexander P.J. Vlaar<sup>6,9</sup>, C. Ellen van der Schoot<sup>1</sup>, Manfred Wuhler<sup>3</sup>, Gestur Vidarsson<sup>1,2,\*</sup> in collaboration with the UMC COVID-19 S3/HCW study group, Radboud University Medical Center (RUMC) & Bavarian Nordic A/S study group and the Janssen Vaccines and Prevention B.V. study group.

<sup>1</sup> Department of Experimental Immunohematology, Sanquin Research, Amsterdam, The Netherlands;

<sup>2</sup> Department of Biomolecular Mass Spectrometry and Proteomics, Utrecht Institute for Pharmaceutical Sciences and Bijvoet Center for Biomolecular Research, Utrecht University, Utrecht, The Netherlands;

<sup>3</sup> Center for Proteomics and Metabolomics, Leiden University Medical Center, Leiden, The Netherlands;

<sup>4</sup> Department of Immunopathology, Sanquin Research, Amsterdam, The Netherlands;

<sup>5</sup> Center for Experimental and Molecular Medicine, Amsterdam Infection & Immunity Institute, Amsterdam, The Netherlands;

<sup>6</sup> Department of Intensive Care, Amsterdam University Medical Center, University of Amsterdam, Amsterdam, The Netherlands;

<sup>7</sup> Department of Medical Microbiology, Radboudumc Center for Infectious Diseases, Radboud Institute for Molecular Life Sciences, Radboud University Medical Center, Nijmegen, The Netherlands;

<sup>8</sup> Centre for Medical Parasitology, Department for Immunology and Microbiology, Faculty of Health and Medical Sciences, University of Copenhagen, Copenhagen, Denmark

<sup>9</sup> Laboratory of Experimental Intensive Care and Anaesthesiology, L.E.I.C.A., Amsterdam University Medical Center, University of Amsterdam, Amsterdam, The Netherlands;

†: These authors contributed equally to this work

\* Corresponding author: g.vidarsson@sanquin.nl

| Table of contents                                                                                                       |
|-------------------------------------------------------------------------------------------------------------------------|
| Supplementary Table 1. Detailed description of cohort 1 - Pfizer                                                        |
| Supplementary Table 2. Detailed description of Cohort 2 - Moderna                                                       |
| Supplementary Table 3. Detailed description of Cohort 3 - Janssen                                                       |
| Supplementary Table 4. Detailed description of Cohort 4 - AstraZeneca                                                   |
| Supplementary Table 5. Detailed description of Cohort 5 - RUMC/BN                                                       |
| Supplementary Table 6. Age comparison with ANOVA ( $p=3.23E-11$ ) with Tukey's test.                                    |
| Supplementary Table 7. Correlations between age and total IgG1 Fc glycosylation and levels in a sex stratified manner   |
| Supplementary Table 8. Correlations between age and anti-S IgG1 Fc glycosylation and levels in a sex stratified manner. |
| Supplementary Table 9. IgG1 glycopeptides included in the final analyte list                                            |
| Supplementary Table 10. Description and calculation of IgG glycosylation derived traits                                 |

**Table S1. Detailed description of Cohort 1 - BNT162b2 (Pfizer/BioNTech).**

|      | Age (yrs) | Sex | Antigen experienced | Days between positive PCR and 1st dose | Days between doses | Serum-Analysis: Days upon 1st (2nd) vaccination                       |
|------|-----------|-----|---------------------|----------------------------------------|--------------------|-----------------------------------------------------------------------|
| 1203 | 40        | F   | Yes                 |                                        | 21                 | 0, 10, 14, 21(0), 25(4), 29(8), 31(10), 42(21), 49(29)                |
| 1182 | 49        | F   | No                  |                                        | 21                 | 1, 7, 14, 26(5), 28(7), 30(9), 35(14), 42(21), 49(28)                 |
| 1561 | 26        | F   | No                  |                                        | 23                 | 1, 6, 8, 12, 14, 23(0), 26(3), 30(7), 44(21), 51(28)                  |
| 1679 | 23        | F   | No                  |                                        | 21                 | 0, 6, 21(0), 49(28)                                                   |
| 1675 | 23        | F   | Yes                 | 287                                    | 21                 | 1, 4, 8, 11, 14, 21(0), 26(5), 28(7), 33(12), 42(21), 49(28)          |
| 1897 | 27        | F   | No                  |                                        | 20                 | 0, 12, 15, 20(0), 39(19), 49(29)                                      |
| 1756 | 25        | F   | Yes                 | 275                                    | 21                 | 0, 7, 11, 15, 21(0), 26(5), 28(7), 32(11), 35(14), 43(22), 49(28)     |
| 1602 | 36        | F   | Yes                 | 64                                     | 21                 | 0, 2, 9, 13, 21(0), 23(2), 28(7), 34(13), 49(28)                      |
| 1264 | 62        | M   | No                  |                                        | 21                 | 0, 3, 7, 10, 11, 14, 21(0), 24(3), 29(8), 31(10), 36(15), 49(28)      |
| 1476 | 51        | F   | No                  |                                        | 21                 | 0, 4, 7, 11, 15, 21(0), 25(4), 28(7), 33(12), 36(15), 43(22), 49(28)  |
| 1507 | 60        | F   | No                  |                                        | 21                 | 1, 5, 7, 9, 14, 21(0), 28(7), 30(9), 35(14), 42(21), 49(28)           |
| 1946 | 59        | M   | No                  |                                        | 22                 | -4, 2, 7, 10, 14, 21, 24(2), 30(8), 38(16), 44(22), 49(27)            |
| 1950 | 37        | F   | No                  |                                        | 21                 | 1, 5, 7, 14, 21(0), 23(2), 27(6), 36(15), 42(21), 49(28)              |
| 1540 | 43        | F   | No                  |                                        | 22                 | 1, 7, 9, 14, 22(0), 26(4), 28(6), 34(12), 37(15), 50(28)              |
| 1130 | 34        | M   | No                  |                                        | 22                 | 1, 5, 7, 14, 22(0), 26(4), 29(7), 33(11), 36(14), 44(22), 50(28)      |
| 1109 | 57        | M   | No                  |                                        | 21                 | 1, 7, 9, 14, 21(0), 26 (5), 29(8), 35 (14), 42(21), 50(29)            |
| 1073 | 30        | F   | Yes                 | 57                                     | 23                 | 1, 8, 13, 23 (0), 30(7), 36(13), 49(26)                               |
| 1169 | 44        | F   | No                  |                                        | 24                 | 3, 7, 10, 14, 21, 27(3), 31(7), 34(10), 38(14), 49(25)                |
| 1949 | 38        | F   | No                  |                                        | 21                 | 0, 3, 7, 13, 21(0), 24(3), 28(7), 31(10), 35(14), 49(28)              |
| 1317 | 39        | F   | No                  |                                        | 21                 | 0, 3, 7, 11, 21(0)                                                    |
| 1291 | 29        | M   | No                  |                                        | 21                 | 0, 5, 8, 13, 15, 21(0), 27(6), 32(11), 48(27)                         |
| 1992 | 61        | F   | No                  |                                        | 22                 | 0, 4, 5, 8, 11, 15, 22(0), 25(3), 29(7), 32(10), 41(19), 49(27)       |
| 1725 | 43        | F   | No                  |                                        | 21                 | 0, 4, 7, 14, 21(0), 25(4), 29(8), 34(13), 42(21), 49(28)              |
| 1219 | 25        | F   | No                  |                                        | 21                 | 1, 5, 7, 9, 21(0), 23(2), 28(7), 30(9), 35(14), 42(21), 49(28)        |
| 1987 | 30        | F   | No                  |                                        | 21                 | 1, 5, 7, 14, 21(0), 26(5), 28(7), 30(9), 35(14), 42(21), 49(28)       |
| 1361 | 51        | F   | No                  |                                        | 21                 | 0, 4, 6, 11, 14, 21(0), 25(4), 32(11), 36(15), 42(21), 49(28)         |
| 1844 | 57        | M   | No                  |                                        | 21                 | 0, 4, 7, 12, 14, 21(0), 26(5), 29(8), 35(14), 49(28)                  |
| 1321 | 27        | M   | No                  |                                        | 22                 | 0, 8, 11, 15, 22(0), 29(7), 32(10), 43(21), 49(28)                    |
| 1122 | 64        | F   | No                  |                                        | 21                 | 1, 5, 8, 12, 14, 21(0), 23(2), 28 (7), 30 (9), 36(15), 42(21), 50(29) |
| 1750 | 59        | F   | No                  |                                        | 22                 | 1, 7, 14, 22(0), 26(4), 33(11), 35(13), 50(28)                        |
| 1338 | 47        | F   | No                  |                                        | 21                 | 1, 6, 11, 13, 21(0), 25(4), 27(6), 33(12), 42(21), 49(28)             |
| 1857 | 36        | F   | No                  |                                        | 22                 | 0, 12, 22(0), 25(3), 36(14), 49(27)                                   |
| 1249 | 46        | M   | No                  |                                        | 21                 | 1, 5, 7, 9, 14, 21(0), 26(5), 28(7), 30(9), 35(14), 50(29)            |
| 1473 | 44        | M   | No                  |                                        | 22                 | 0, 6, 13, 22(0), 29(7), 36(14), 49(27)                                |
| 1485 | 39        | M   | No                  |                                        | 21                 | 1, 5, 9, 13, 21(0), 23(2), 27(6), 42(21), 48(27)                      |
| 1738 | 40        | M   | No                  |                                        | 21                 | 0, 3, 5, 10, 14, 21(9), 24(3), 26(5), 32(11), 34(13), 42(21), 49(28)  |

|        |    |   |     |     |    |                                                                              |
|--------|----|---|-----|-----|----|------------------------------------------------------------------------------|
| 1757   | 33 | F | Yes | 288 | 20 | 0, 4, 7, 11, 14, 20(0), 22(2), 35(15), 49(27)                                |
| 1902   | 34 | M | No  |     | 22 | 0, 4, 11, 15, 22(0), 35(13), 41(19), 49(27)                                  |
| 1953   | 46 | F | No  |     | 21 | 0, 4, 6, 10, 14, 19, 24(3), 27(6),<br>32(11), 35(14), 42(21), 49(28)         |
| VC-001 | 58 | M | No  |     | 21 | 0, 3, 7, 11, 14, 17, 21(0), 24(3), 28(7),<br>32(11), 35(14), 39(18), 42(21)  |
| SCM    | 28 | M | No  |     | 21 | 0, 4, 8, 11, 15, 18, 21(0), 25(4), 29(8),<br>31(10), 36(15), 39(18), 42(21)  |
| TOA    | 35 | M | No  |     | 21 | -1, 3, 7, 10, 14, 17, 20, 24(3), 28(7),<br>30(9), 35(14), 38(17), 41(20)     |
| ANSP   | 62 | M | No  |     | 21 | 0, 4, 8, 11, 15, 18, 22(1), 25(4), 29(8),<br>32(11), 35(14), 43(22), 45(24)  |
| COA    | 28 | F | No  |     | 21 | -1, 3, 6, 10, 13, 17, 20, 24(3), 27(6),<br>31(10), 34(13), 38(17), 41(20)    |
| BAC    | 29 | F | No  |     | 21 | -1, 3, 6, 10, 13, 17, 20, 25(4), 27(6),<br>31(10), 34(13), 38(17), 41(20)    |
| LUAN   | 59 | F | No  |     | 21 | 0, 4, 8, 11, 15, 18, 22(1), 25(4), 32(11),<br>34(13), 36(15), 39(18), 43(22) |
| MIL    | 53 | F | No  |     | 21 | -1, 2, 6, 9, 13, 16, 20, 23(2), 27(6),<br>30(9), 34(13), 37(16), 41(20)      |
| BEGI   | 55 | F | No  |     | 21 | 0, 3, 7, 10, 14, 17, 21, 24(3), 28(7),<br>31(10), 35(14), 38(17), 42(21)     |

**Table S2. Detailed description of Cohort 2 - SpikeVax (Moderna).**

| <b>Participant</b> | <b>Age (yrs)</b> | <b>Sex</b> | <b>Antigen experienced</b> | <b>Days between doses</b> | <b>Serum-Analysis: Days upon 1st (2nd) dose</b>               |
|--------------------|------------------|------------|----------------------------|---------------------------|---------------------------------------------------------------|
| 110819             | 27               | F          | No                         | 28                        | 0, 3, 7, 10, 21, 28(0), 35(7), 38(10), 42(14), 49(21), 56(28) |
| 110821             | 42               | F          | No                         | 28                        | 0, 30, 11, 17, 24, 31(3), 35(7), 38(10), 49(21), 59(31)       |
| 110825             | 26               | F          | No                         | 28                        | 0, 3, 12, 17, 24, 28(0), 38(10), 41(13), 56(28)               |
| 110826             | 33               | F          | No                         | 28                        | 0, 5, 21, 28(0), 60(32)                                       |
| 110827             | 26               | F          | No                         | 28                        | 0, 4, 6, 11, 14, 21, 27, 31(3), 35(7), 38(10), 41(13), 60(32) |
| 110828             | 56               | F          | No                         | 28                        | 3, 7, 10, 14, 21, 28(0), 38(19), 41(13), 49(21), 59(31)       |
| 110841             | 51               | F          | No                         | 28                        | 3, 7, 10, 20, 27, 31(3), 38(10), 42(14), 49(21), 55(27)       |
| 110842             | 33               | F          | No                         | 28                        | 0, 3, 11, 14, 20, 28(0), 31(3), 38(10), 48(20), 55(27)        |

**Table S3. Detailed description of Cohort 3 - Jcovden (Janssen).**

|    | Age (yrs) | Sex | Regimen | Antigen experienced | Days between doses | Days upon 1st (2nd) vaccination                   |
|----|-----------|-----|---------|---------------------|--------------------|---------------------------------------------------|
| 1  | 68        | M   | 1 dose  | No                  |                    | 1, 15, 29, 57, 64, 71, 85, 169                    |
| 2  | 25        | M   | 1 dose  | No                  |                    | 1, 15, 29, 57, 64, 71, 85, 169                    |
| 3  | 25        | M   | 1 dose  | No                  |                    | 1, 15, 29, 64, 71, 85, 169                        |
| 4  | 43        | M   | 1 dose  | No                  |                    | 1, 15, 29, 57, 64, 71, 85, 169                    |
| 5  | 66        | F   | 1 dose  | No                  |                    | 1, 15, 29, 57, 64, 71, 85, 169                    |
| 6  | 44        | F   | 1 dose  | No                  |                    | 1, 15, 29, 57, 64, 71, 85, 169                    |
| 7  | 20        | F   | 1 dose  | No                  |                    | 1, 15, 29, 57, 64, 71, 85, 169                    |
| 8  | 38        | M   | 1 dose  | No                  |                    | 1, 15, 29, 57, 64, 71, 85, 169                    |
| 9  | 66        | M   | 1 dose  | No                  |                    | 1, 15, 29, 57, 64, 71, 85, 169                    |
| 10 | 26        | M   | 1 dose  | No                  |                    | 1, 15, 29, 57, 64, 71, 85, 169                    |
| 11 | 65        | F   | 1 dose  | No                  |                    | 1, 15, 29, 57, 64, 71, 85, 169                    |
| 12 | 55        | M   | 1 dose  | During              |                    | 1, 15, 29, 57, 64, 71, 85, 169                    |
| 13 | 50        | M   | 1 dose  | No                  |                    | 1, 15, 29, 57, 64, 71, 85, 169                    |
| 14 | 67        | M   | 1 dose  | No                  |                    | 1, 15, 29, 57, 64, 71, 85, 169                    |
| 15 | 66        | M   | 1 dose  | No                  |                    | 1, 15, 29, 57, 64, 71, 85, 169                    |
| 16 | 51        | M   | 1 dose  | No                  |                    | 1, 15, 29, 57, 64, 71, 85, 169                    |
| 17 | 65        | F   | 1 dose  | No                  |                    | 1, 15, 29, 57, 64, 71, 85, 169                    |
| 18 | 39        | M   | 1 dose  | No                  |                    | 1, 15, 29, 57, 64, 71, 85, 169                    |
| 19 | 65        | M   | 1 dose  | No                  |                    | 1, 15, 29, 57, 64, 71, 85, 169                    |
| 20 | 71        | F   | 1 dose  | No                  |                    | 1, 15, 29, 57, 64, 71, 85, 169                    |
| 21 | 46        | M   | 1 dose  | No                  |                    | 1, 15, 29, 57, 64, 71, 85, 169                    |
| 22 | 28        | M   | 1 dose  | No                  |                    | 1, 15, 29, 57, 64, 71, 85, 169                    |
| 23 | 75        | M   | 1 dose  | No                  |                    | 1, 15, 29, 57, 64, 71, 85, 169                    |
| 24 | 37        | M   | 1 dose  | No                  |                    | 57, 64, 71, 85, 169                               |
| 25 | 71        | M   | 1 dose  | No                  |                    | 1, 15, 29, 57, 64, 71, 169                        |
| 26 | 40        | M   | 1 dose  | No                  |                    | 1, 15, 29, 57, 64, 71, 85, 169                    |
| 27 | 76        | M   | 1 dose  | No                  |                    | 1, 15, 29, 57, 64, 71, 85, 169                    |
| 28 | 54        | F   | 1 dose  | No                  |                    | 1, 15, 29, 57, 64, 71, 85, 169                    |
| 29 | 22        | F   | 1 dose  | No                  |                    | 1, 15, 29, 57, 64, 71, 85, 169                    |
| 30 | 22        | F   | 1 dose  | No                  |                    | 1, 15, 29, 57, 64, 71, 85, 169                    |
| 31 | 73        | M   | 1 dose  | No                  |                    | 1, 15, 29, 57, 64, 71, 85, 169                    |
| 32 | 40        | M   | 1 dose  | No                  |                    | 1, 15, 29, 57, 64, 71, 85, 169                    |
| 33 | 32        | M   | 1 dose  | No                  |                    | 1, 15, 29                                         |
| 34 | 52        | M   | 1 dose  | No                  |                    | 1, 15, 29, 64, 71, 85, 169                        |
| 35 | 68        | F   | 1 dose  | No                  |                    | 1, 15, 29, 57, 64, 71, 85, 169                    |
| 36 | 23        | F   | 1 dose  | No                  |                    | 1, 15, 29, 57, 64, 71, 85, 169                    |
| 37 | 67        | F   | 1 dose  | No                  |                    | 1, 15, 29, 169                                    |
| 38 | 28        | F   | 1 dose  | No                  |                    | 1, 15, 29, 57, 64, 71, 85, 169                    |
| 39 | 21        | F   | 1 dose  | No                  |                    | 1, 15, 29, 57(0), 64(7), 71(14), 85(28), 169(112) |
| 40 | 38        | M   | 2 doses | No                  | 57                 | 1, 15, 29, 57(0), 64(7), 71(14), 85(28), 169(112) |
| 41 | 23        | F   | 2 doses | No                  | 57                 | 1, 15, 29, 57(0), 64(7), 71(14), 85(28), 169(112) |
| 42 | 69        | F   | 2 doses | No                  | 57                 | 1, 15, 29, 57(0), 64(7), 71(14), 85(28), 169(112) |
| 43 | 29        | M   | 2 doses | No                  | 57                 | 1, 15, 29, 57(0), 64(7), 71(14), 85(28), 169(112) |
| 44 | 45        | M   | 2 doses | No                  | 57                 | 1, 15, 29, 57(0), 64(7), 71(14), 85(28), 169(112) |
| 45 | 36        | F   | 2 doses | No                  | 57                 | 57(0), 64(7), 71(14), 85(28), 169(112)            |
| 46 | 43        | M   | 2 doses | No                  | 57                 | 1, 15, 29, 57(0), 64(7), 71(14), 85(28), 169(112) |
| 47 | 36        | M   | 2 doses | Yes                 | 57                 | 1, 15, 29, 57(0), 64(7), 71(14), 85(28), 169(112) |
| 48 | 48        | M   | 2 doses | No                  | 57                 | 1, 15, 29, 57(0), 64(7), 71(14), 85(28), 169(112) |
| 49 | 40        | F   | 2 doses | No                  | 57                 | 1, 15, 29, 57(0), 64(7), 71(14), 85(28), 169(112) |
| 50 | 51        | M   | 2 doses | No                  | 57                 | 1, 15, 29, 57(0), 64(7), 71(14), 85(28), 169(112) |
| 51 | 69        | M   | 2 doses | No                  | 57                 | 1, 15, 29, 57(0), 64(7), 71(14), 85(28), 169(112) |
| 52 | 73        | F   | 2 doses | No                  | 57                 | 1, 15, 29, 57(0), 64(7), 71(14), 85(28), 169(112) |
| 53 | 67        | M   | 2 doses | No                  | 57                 | 1, 15, 29, 57(0), 64(7), 71(14), 85(28), 169(112) |
| 54 | 79        | M   | 2 doses | No                  | 57                 | 1, 15, 29, 57(0), 64(7), 71(14), 85(28), 169(112) |
| 55 | 46        | F   | 2 doses | No                  | 57                 | 1, 15, 29, 57(0), 64(7), 71(14), 85(28), 169(112) |
| 56 | 22        | M   | 2 doses | No                  | 57                 | 1, 15, 29, 57(0), 64(7), 71(14), 85(28), 169(112) |
| 57 | 50        | F   | 2 doses | No                  | 57                 | 1, 15, 29, 57(0), 64(7), 71(14), 85(28), 169(112) |

|    |    |   |         |        |    |                                                   |
|----|----|---|---------|--------|----|---------------------------------------------------|
| 58 | 65 | M | 2 doses | No     | 57 | 1, 15, 29, 57(0), 64(7), 71(14), 85(28), 169(112) |
| 59 | 77 | F | 2 doses | No     | 57 | 1, 15, 29, 57(0), 64(7), 71(14), 85(28), 169(112) |
| 60 | 77 | M | 2 doses | No     | 57 | 1, 15, 29, 57(0), 64(7), 71(14), 85(28), 169(112) |
| 61 | 72 | M | 2 doses | No     | 57 | 1, 15, 29, 57(0), 64(7), 71(14), 85(28), 169(112) |
| 62 | 78 | M | 2 doses | No     | 57 | 1, 15, 29, 57(0), 64(7), 71(14), 85(28), 169(112) |
| 63 | 70 | M | 2 doses | No     | 57 | 1, 15, 29, 57(0), 64(7), 71(14), 85(28), 169(112) |
| 64 | 28 | M | 2 doses | No     | 57 | 1, 15, 29, 57(0), 64(7), 71(14), 85(28), 169(112) |
| 65 | 76 | F | 2 doses | No     | 57 | 1, 15, 29, 57(0), 64(7), 71(14), 85(28), 169(112) |
| 66 | 41 | M | 2 doses | No     | 57 | 1, 15, 29, 57(0), 64(7), 71(14), 85(28), 169(112) |
| 67 | 50 | M | 2 doses | No     | 57 | 1, 15, 29, 57(0), 64(7), 71(14), 85(28), 169(112) |
| 68 | 78 | M | 2 doses | No     | 57 | 1, 15, 29, 57(0), 64(7), 71(14), 85(28), 169(112) |
| 69 | 46 | M | 2 doses | No     | 57 | 1, 15, 29, 57(0), 64(7), 71(14), 85(28), 169(112) |
| 70 | 49 | M | 2 doses | No     | 57 | 15, 29, 57(0), 64(7), 71(14), 85(28), 169(112)    |
| 71 | 55 | F | 2 doses | No     | 57 | 1, 15, 29, 57(0), 64(7), 71(14), 85(28), 169(112) |
| 72 | 50 | M | 2 doses | During | 57 | 1, 15, 29, 57(0), 64(7), 71(14), 85(28), 169(112) |
| 73 | 42 | F | 2 doses | No     | 57 | 1, 15, 29, 57(0), 64(7), 71(14), 85(28), 169(112) |
| 74 | 38 | M | 2 doses | No     | 57 | 1, 15, 29, 57(0), 64(7), 71(14), 85(28), 169(112) |
| 75 | 27 | M | 2 doses | No     | 57 | 1, 15, 29, 57(0), 64(7), 71(14), 85(28), 169(112) |
| 76 | 77 | M | 2 doses | No     | 57 | 1, 15, 29, 57(0), 64(7), 71(14), 85(28), 169(112) |
| 77 | 25 | M | 2 doses | No     | 57 | 1, 15, 29, 57(0), 64(7), 71(14), 85(28), 169(112) |
| 78 | 26 | M | 2 doses | No     | 57 | 1, 15, 29, 57(0), 64(7), 71(14), 85(28), 169(112) |



**Table S4. Detailed description of Cohort 4 - ChAdOx1 (AstraZeneca).**

|        | Age (yrs) | Sex | Antigen experienced | Days between positive PCR and 1st dose | Days between doses | Serum-Analysis: Days upon 1st (2nd) dose                                     |
|--------|-----------|-----|---------------------|----------------------------------------|--------------------|------------------------------------------------------------------------------|
| 110289 | 61        | M   | No                  |                                        | 78                 | 0, 2, 7, 9, 14, 21, 28, 77, 85(7), 90(12), 92(14), 98(20), 105(27)           |
| 110764 | 60        | F   | No                  |                                        | 78                 | 0, 2, 7, 9, 14, 28, 78(0), 82(4), 97(19)                                     |
| 110808 | 64        | F   | No                  |                                        | 56                 | 2, 7, 9, 14, 21, 28, 56(0), 70(14), 77(21), 84(28)                           |
| 110810 | 62        | M   | Yes                 | 170                                    | 57                 | 0, 2, 8, 26, 37, 57(0), 89(32)                                               |
| 110844 | 65        | F   | No                  |                                        | 48                 | 0, 4, 7, 11, 14, 21, 27, 48 (0), 56(8), 60(12), 62(14), 70(22), 83(35)       |
| 110845 | 60        | F   | No                  |                                        | 49                 | 0, 4, 7, 18, 26, 49(0), 53(4), 56(7), 63(14), 70(21), 77(28)                 |
| 110846 | 65        | F   | No                  |                                        | 48                 | 0, 5, 14, 21, 26, 47, 61(13), 82(34)                                         |
| 110847 | 62        | M   | No                  |                                        | 49                 | 9, 5, 14, 26, 49(0), 54(5), 61(12), 63(14), 77(28)                           |
| 110848 | 60        | F   | No                  |                                        | 49                 | 0, 4, 7, 21, 27, 49(0), 55(6), 67(18), 70(21), 76(27)                        |
| 110849 | 65        | F   | No                  |                                        | 49                 | 0, 4, 7, 11, 14, 21, 49(0), 53(4), 56(7), 60(11), 63(14)                     |
| 110850 | 62        | F   | No                  |                                        | 48                 | 0, 4, 11, 14, 21, 26, 48(0), 50(2), 55(7), 57(9), 62(14), 70(22)             |
| 110851 | 60        | F   | No                  |                                        | 49                 | 0, 49(0), 77(28)                                                             |
| 110852 | 61        | F   | No                  |                                        | 49                 | 0, 4, 11, 14, 21, 25, 49(0), 53(4), 56(7), 60(11), 63(14), 70(21), 77(28)    |
| 110853 | 63        | F   | Yes                 | 49                                     |                    | 0, 21                                                                        |
| 110854 | 66        | F   | No                  |                                        | 48                 | 0, 4, 11, 14, 21, 27, 48(0), 50(2), 55(7), 57(9), 62(14), 69(21), 77(29)     |
| 110855 | 65        | F   | No                  |                                        | 49                 | 0, 4, 8, 11, 15, 22, 27, 49(0), 53(4), 57(8), 61(12), 64(15), 71(22), 76(27) |
| 110856 | 65        | M   | No                  |                                        | 43                 | -6, 5, 8, 15, 20, 43, 48(0), 50(7), 58(15), 62(19)                           |

**Table S5. Detailed description of Cohort 5 - ABNCoV2 (Radboud University Medical Center and Bavarian Nordics A**

| Participant | Age (yrs) | Sex | Regimen            | Antigen experienced | Days between positive PCR and 1st dose | Days between doses | Days upon 1st (2nd) vaccination |
|-------------|-----------|-----|--------------------|---------------------|----------------------------------------|--------------------|---------------------------------|
| AA - 0007   | 35        | M   | 6 µg without MF59  | No                  |                                        | 28                 | 14, 25, 42(14)                  |
| CA - 2765   | 31        | F   | 6 µg without MF59  | No                  |                                        | 27                 | 14, 24, 41(14)                  |
| AD - 1006   | 21        | F   | 6 µg without MF59  | No                  |                                        | 27                 | 14, 24, 41(14)                  |
| BA - 0010   | 27        | F   | 6 µg with MF59     | No                  |                                        | 28                 | 15, 25, 42(14)                  |
| BB - 3950   | 22        | F   | 6 µg with MF59     | No                  |                                        | 35                 | 14, 32, 49(14)                  |
| BC - 0024   | 52        | F   | 6 µg with MF59     | No                  |                                        | 28                 | 14, 25, 42(14)                  |
| AB - 0014   | 34        | F   | 12 µg without MF59 | No                  |                                        | 28                 | 15, 25, 42(14)                  |
| CB - 0120   | 23        | F   | 12 µg without MF59 | No                  |                                        | 28                 | 14, 25, 42(14)                  |
| CD - 3733   | 25        | M   | 12 µg without MF59 | No                  |                                        | 27                 | 13, 24, 41(14)                  |
| DB - 0083   | 22        | M   | 12 µg with MF59    | No                  |                                        | 28                 | 14, 25, 42(14)                  |
| DC - 0059   | 37        | M   | 12 µg with MF59    | No                  |                                        | 27                 | 13, 24, 41(14)                  |
| DD - 0091   | 37        | F   | 12 µg with MF59    | No                  |                                        | 27                 | 13, 24, 41(14)                  |
| EA - 0085   | 22        | F   | 25 µg without MF59 | No                  |                                        | 28                 | 14, 25, 42(14)                  |
| EB - 0116   | 28        | F   | 25 µg without MF59 | No                  |                                        | 27                 | 13, 24, 41(14)                  |
| FD - 0144   | 27        | M   | 25 µg without MF59 | No                  |                                        | 27                 | 13, 24, 41(14)                  |
| HB - 0079   | 54        | F   | 25 µg with MF59    | No                  |                                        | 27                 | 13, 24, 41(14)                  |
| FC - 0123   | 33        | F   | 25 µg with MF59    | No                  |                                        | 28                 | 14, 25, 43(15)                  |
| FE - 0176   | 48        | M   | 25 µg with MF59    | No                  |                                        | 28                 | 14, 25, 43(15)                  |
| GD - 0110   | 28        | F   | 50 µg without MF59 | No                  |                                        | 28                 | 15, 25, 42(14)                  |
| GH - 0253   | 25        | M   | 50 µg without MF59 | No                  |                                        | 29                 | 14, 25, 43(14)                  |
| HE - 0041   | 44        | F   | 50 µg without MF59 | No                  |                                        | 29                 | 14, 25, 42(13)                  |
| GB - 1012   | 20        | F   | 50 µg without MF59 | No                  |                                        | 29                 | 14, 25, 42(13)                  |
| HF - 0200   | 26        | M   | 50 µg without MF59 | No                  |                                        | 29                 | 14, 25, 42(13)                  |
| GF - 1010   | 22        | F   | 50 µg without MF59 | No                  |                                        | 29                 | 14, 25, 42(13)                  |
| FB - 0003   | 46        | M   | 70 µg without MF59 | No                  |                                        | 29                 | 14, 25, 42(13)                  |
| HC - 0168   | 21        | F   | 70 µg without MF59 | No                  |                                        | 27                 | 13, 24, 41(14)                  |
| GE - 0114   | 20        | M   | 70 µg without MF59 | No                  |                                        | 27                 | 13, 24, 41(14)                  |
| HD - 0169   | 20        | F   | 70 µg without MF59 | No                  |                                        | 26                 | 12, 23, 40(14)                  |
| IE - 0162   | 20        | M   | 70 µg without MF59 | No                  |                                        | 27                 | 13, 24, 41(14)                  |
| JE - 0224   | 43        | F   | 70 µg without MF59 | No                  |                                        | 27                 | 13, 24, 41(14)                  |
| JH - 0237   | 25        | F   | 25 µg without MF59 | No                  |                                        | 28                 | 14, 25, 42(14)                  |
| IG - 0303   | 24        | M   | 25 µg without MF59 | No                  |                                        | 28                 | 14, 25, 42(14)                  |
| IC - 0139   | 21        | M   | 25 µg without MF59 | No                  |                                        | 28                 | 14, 28, 42(14)                  |
| JK - 0411   | 24        | F   | 25 µg without MF59 | No                  |                                        | 28                 | 14, 25, 42(14)                  |
| JP - 1027   | 21        | M   | 25 µg without MF59 | No                  |                                        | 28                 | 14, 25, 42(14)                  |
| JQ - 1041   | 38        | F   | 25 µg without MF59 | No                  |                                        | 28                 | 14, 25, 42(14)                  |
| KA - 1058   | 23        | M   | 25 µg without MF59 | No                  |                                        | 28                 | 14, 24, 41(13)                  |
| IL - 1053   | 45        | F   | 25 µg without MF59 | No                  |                                        | 28                 | 14, 25, 42(14)                  |
| IM -1057    | 27        | M   | 25 µg without MF59 | No                  |                                        | 28                 | 14, 25, 42(14)                  |
| JN - 0423   | 18        | M   | 50 µg without MF59 | No                  |                                        | 28                 | 14, 24, 42(14)                  |
| IK - 1017   | 29        | F   | 50 µg without MF59 | No                  |                                        | 28                 | 14, 24, 41(13)                  |
| JL - 0417   | 22        | M   | 50 µg without MF59 | No                  |                                        | 29                 | 13, 26, 43(14)                  |
| GC - 0096   | 26        | M   | 50 µg without MF59 | No                  |                                        | 27                 | 13, 23, 41(14)                  |
| JO - 1018   | 21        | F   | 50 µg without MF59 | No                  |                                        | 29                 | 13, 26, 43(14)                  |
| KB - 0445   | 29        | F   | 50 µg without MF59 | No                  |                                        | 27                 | 14, 23, 41(14)                  |

**Table S6. Age comparison with ANOVA ( $p=3.23E-11$ ) with Tukey's**

|                    | <b>Pfizer</b> | <b>Moderna</b> | <b>Janssen</b> | <b>AstraZeneca</b> | <b>RUMC/BN</b> |
|--------------------|---------------|----------------|----------------|--------------------|----------------|
| <b>Pfizer</b>      |               | 0.865          | 0.744          | 0.000875           | 0.00014        |
| <b>Moderna</b>     |               |                | 0.537          | 0.00635            | 0.79           |
| <b>Janssen</b>     |               |                |                | 0.00721            | 5.82E-08       |
| <b>AstraZeneca</b> |               |                |                |                    | 1.34E-09       |
| <b>RUMC/BN</b>     |               |                |                |                    |                |

**Table S7. Spearman correlations between age and total IgG1 Fc glycosylation and levels in a sex stratified manner.**

Correlations are shown as per cohort , at seroconversion (Cohort) or 2 weeks post-booster (Cohort2). NA: not applicable.

| Cohort            | Timepoint            | Sex    | var1 | var2                       | R <sub>s</sub> | p-value | adjusted p-value |
|-------------------|----------------------|--------|------|----------------------------|----------------|---------|------------------|
| AstraZeneca       | Seroconversion       | Female | Age  | Total IgG1 bisection       | -0.85          | 0.01    | 0.11             |
| AstraZeneca       | Seroconversion       | Female | Age  | Total IgG1 fucosylation    | -0.30          | 0.52    | 0.91             |
| AstraZeneca       | Seroconversion       | Female | Age  | Total IgG1 galactosylation | -0.70          | 0.08    | 0.30             |
| AstraZeneca       | Seroconversion       | Female | Age  | Total IgG1 sialylation     | -0.56          | 0.20    | 0.46             |
| AstraZeneca       | Seroconversion       | Male   | Age  | Total IgG1 bisection       | -1.00          | 1.00    | 1.00             |
| AstraZeneca       | Seroconversion       | Male   | Age  | Total IgG1 fucosylation    | -1.00          | 1.00    | 1.00             |
| AstraZeneca       | Seroconversion       | Male   | Age  | Total IgG1 galactosylation | 1.00           | 1.00    | 1.00             |
| AstraZeneca       | Seroconversion       | Male   | Age  | Total IgG1 sialylation     | 1.00           | 1.00    | 1.00             |
| Janssen           | Seroconversion       | Female | Age  | Total IgG1 bisection       | 0.41           | 0.12    | 0.34             |
| Janssen           | Seroconversion       | Female | Age  | Total IgG1 fucosylation    | -0.39          | 0.13    | 0.35             |
| Janssen           | Seroconversion       | Female | Age  | Total IgG1 galactosylation | -0.62          | 0.01    | 0.09             |
| Janssen           | Seroconversion       | Female | Age  | Total IgG1 sialylation     | -0.60          | 0.01    | 0.11             |
| Janssen           | Seroconversion       | Male   | Age  | Total IgG1 bisection       | 0.36           | 0.03    | 0.18             |
| Janssen           | Seroconversion       | Male   | Age  | Total IgG1 fucosylation    | -0.32          | 0.07    | 0.29             |
| Janssen           | Seroconversion       | Male   | Age  | Total IgG1 galactosylation | -0.23          | 0.18    | 0.44             |
| Janssen           | Seroconversion       | Male   | Age  | Total IgG1 sialylation     | -0.01          | 0.97    | 1.00             |
| Modema            | Seroconversion       | Female | Age  | Total IgG1 bisection       | 0.10           | 0.87    | 1.00             |
| Modema            | Seroconversion       | Female | Age  | Total IgG1 fucosylation    | -0.21          | 0.74    | 1.00             |
| Modema            | Seroconversion       | Female | Age  | Total IgG1 galactosylation | -0.67          | 0.22    | 0.50             |
| Modema            | Seroconversion       | Female | Age  | Total IgG1 sialylation     | -0.41          | 0.49    | 0.90             |
| Pfizer            | Seroconversion       | Female | Age  | Total IgG1 bisection       | 0.42           | 0.09    | 0.31             |
| Pfizer            | Seroconversion       | Female | Age  | Total IgG1 fucosylation    | -0.38          | 0.13    | 0.35             |
| Pfizer            | Seroconversion       | Female | Age  | Total IgG1 galactosylation | -0.52          | 0.03    | 0.18             |
| Pfizer            | Seroconversion       | Female | Age  | Total IgG1 sialylation     | -0.45          | 0.07    | 0.30             |
| Pfizer            | Seroconversion       | Male   | Age  | Total IgG1 bisection       | 0.70           | 0.01    | 0.08             |
| Pfizer            | Seroconversion       | Male   | Age  | Total IgG1 fucosylation    | -0.18          | 0.56    | 0.92             |
| Pfizer            | Seroconversion       | Male   | Age  | Total IgG1 galactosylation | -0.50          | 0.08    | 0.30             |
| Pfizer            | Seroconversion       | Male   | Age  | Total IgG1 sialylation     | -0.45          | 0.13    | 0.35             |
| RUMC/BN           | Seroconversion       | Female | Age  | Total IgG1 bisection       | 0.01           | 0.97    | 1.00             |
| RUMC/BN           | Seroconversion       | Female | Age  | Total IgG1 fucosylation    | -0.16          | 0.53    | 0.92             |
| RUMC/BN           | Seroconversion       | Female | Age  | Total IgG1 galactosylation | 0.09           | 0.74    | 1.00             |
| RUMC/BN           | Seroconversion       | Female | Age  | Total IgG1 sialylation     | -0.11          | 0.68    | 1.00             |
| RUMC/BN           | Seroconversion       | Male   | Age  | Total IgG1 bisection       | 0.54           | 0.04    | 0.21             |
| RUMC/BN           | Seroconversion       | Male   | Age  | Total IgG1 fucosylation    | 0.03           | 0.92    | 1.00             |
| RUMC/BN           | Seroconversion       | Male   | Age  | Total IgG1 galactosylation | 0.03           | 0.91    | 1.00             |
| RUMC/BN           | Seroconversion       | Male   | Age  | Total IgG1 sialylation     | 0.12           | 0.69    | 1.00             |
| AstraZeneca       | 2 weeks post-booster | Female | Age  | Total IgG1 bisection       | -0.09          | 0.87    | 1.00             |
| AstraZeneca       | 2 weeks post-booster | Female | Age  | Total IgG1 fucosylation    | 0.06           | 0.91    | 1.00             |
| AstraZeneca       | 2 weeks post-booster | Female | Age  | Total IgG1 galactosylation | -0.46          | 0.35    | 0.71             |
| AstraZeneca       | 2 weeks post-booster | Female | Age  | Total IgG1 sialylation     | -0.14          | 0.78    | 1.00             |
| AstraZeneca       | 2 weeks post-booster | Male   | Age  | Total IgG1 bisection       | 1.00           | 1.00    | 1.00             |
| AstraZeneca       | 2 weeks post-booster | Male   | Age  | Total IgG1 fucosylation    | 1.00           | 1.00    | 1.00             |
| AstraZeneca       | 2 weeks post-booster | Male   | Age  | Total IgG1 galactosylation | -1.00          | 1.00    | 1.00             |
| AstraZeneca       | 2 weeks post-booster | Male   | Age  | Total IgG1 sialylation     | -1.00          | 1.00    | 1.00             |
| Janssen (1 dose)  | 2 weeks post-booster | Female | Age  | Total IgG1 bisection       | 0.44           | 0.15    | 0.38             |
| Janssen (1 dose)  | 2 weeks post-booster | Female | Age  | Total IgG1 fucosylation    | -0.73          | 0.01    | 0.08             |
| Janssen (1 dose)  | 2 weeks post-booster | Female | Age  | Total IgG1 galactosylation | -0.29          | 0.36    | 0.72             |
| Janssen (1 dose)  | 2 weeks post-booster | Female | Age  | Total IgG1 sialylation     | -0.46          | 0.13    | 0.35             |
| Janssen (1 dose)  | 2 weeks post-booster | Male   | Age  | Total IgG1 bisection       | 0.38           | 0.09    | 0.30             |
| Janssen (1 dose)  | 2 weeks post-booster | Male   | Age  | Total IgG1 fucosylation    | -0.29          | 0.19    | 0.46             |
| Janssen (1 dose)  | 2 weeks post-booster | Male   | Age  | Total IgG1 galactosylation | -0.09          | 0.68    | 1.00             |
| Janssen (1 dose)  | 2 weeks post-booster | Male   | Age  | Total IgG1 sialylation     | -0.11          | 0.62    | 0.96             |
| Janssen (2 doses) | 2 weeks post-booster | Female | Age  | Total IgG1 bisection       | -0.45          | 0.17    | 0.43             |
| Janssen (2 doses) | 2 weeks post-booster | Female | Age  | Total IgG1 fucosylation    | 0.17           | 0.61    | 0.96             |
| Janssen (2 doses) | 2 weeks post-booster | Female | Age  | Total IgG1 galactosylation | -0.82          | 0.00    | 0.06             |
| Janssen (2 doses) | 2 weeks post-booster | Female | Age  | Total IgG1 sialylation     | -0.63          | 0.04    | 0.21             |
| Janssen (2 doses) | 2 weeks post-booster | Male   | Age  | Total IgG1 bisection       | 0.32           | 0.11    | 0.34             |
| Janssen (2 doses) | 2 weeks post-booster | Male   | Age  | Total IgG1 fucosylation    | 0.01           | 0.95    | 1.00             |
| Janssen (2 doses) | 2 weeks post-booster | Male   | Age  | Total IgG1 galactosylation | -0.47          | 0.01    | 0.11             |
| Janssen (2 doses) | 2 weeks post-booster | Male   | Age  | Total IgG1 sialylation     | -0.22          | 0.26    | 0.58             |
| Modema            | 2 weeks post-booster | Female | Age  | Total IgG1 bisection       | -0.21          | 0.74    | 1.00             |
| Modema            | 2 weeks post-booster | Female | Age  | Total IgG1 fucosylation    | 0.15           | 0.81    | 1.00             |
| Modema            | 2 weeks post-booster | Female | Age  | Total IgG1 galactosylation | -0.36          | 0.55    | 0.92             |
| Modema            | 2 weeks post-booster | Female | Age  | Total IgG1 sialylation     | -0.82          | 0.09    | 0.30             |
| Pfizer            | 2 weeks post-booster | Female | Age  | Total IgG1 bisection       | 1.00           | 1.00    | 1.00             |
| Pfizer            | 2 weeks post-booster | Female | Age  | Total IgG1 fucosylation    | 1.00           | 1.00    | 1.00             |
| Pfizer            | 2 weeks post-booster | Female | Age  | Total IgG1 galactosylation | -1.00          | 1.00    | 1.00             |
| Pfizer            | 2 weeks post-booster | Female | Age  | Total IgG1 sialylation     | -1.00          | 1.00    | 1.00             |
| Pfizer            | 2 weeks post-booster | Male   | Age  | Total IgG1 bisection       | 0.74           | 0.03    | 0.18             |
| Pfizer            | 2 weeks post-booster | Male   | Age  | Total IgG1 fucosylation    | -0.24          | 0.57    | 0.92             |
| Pfizer            | 2 weeks post-booster | Male   | Age  | Total IgG1 galactosylation | -0.31          | 0.45    | 0.86             |
| Pfizer            | 2 weeks post-booster | Male   | Age  | Total IgG1 sialylation     | -0.10          | 0.82    | 1.00             |
| RUMC/BN           | 2 weeks post-booster | Female | Age  | Total IgG1 bisection       | 0.04           | 0.87    | 1.00             |
| RUMC/BN           | 2 weeks post-booster | Female | Age  | Total IgG1 fucosylation    | -0.20          | 0.46    | 0.86             |
| RUMC/BN           | 2 weeks post-booster | Female | Age  | Total IgG1 galactosylation | -0.04          | 0.88    | 1.00             |
| RUMC/BN           | 2 weeks post-booster | Female | Age  | Total IgG1 sialylation     | -0.14          | 0.60    | 0.96             |

|         |                      |      |     |                            |       |      |      |
|---------|----------------------|------|-----|----------------------------|-------|------|------|
| RUMC/BN | 2 weeks post-booster | Male | Age | Total IgG1 bisection       | 0.31  | 0.30 | 0.63 |
| RUMC/BN | 2 weeks post-booster | Male | Age | Total IgG1 fucosylation    | 0.18  | 0.55 | 0.92 |
| RUMC/BN | 2 weeks post-booster | Male | Age | Total IgG1 galactosylation | -0.20 | 0.51 | 0.91 |
| RUMC/BN | 2 weeks post-booster | Male | Age | Total IgG1 sialylation     | 0.11  | 0.73 | 1.00 |

**Table S8. Correlations between age and anti-S IgG1 Fc glycosylation and levels in a sex stratified manner.**

Spearman correlations are shown as per cohort, at seroconversion (Cohort) or 2 weeks post-booster (Cohort2). NA: not applicable.

| Cohort            | Timepoint            | Sex    | var1 | var2                        | Rs       | p-value | adjusted p-value |
|-------------------|----------------------|--------|------|-----------------------------|----------|---------|------------------|
| AstraZeneca       | Seroconversion       | Female | Age  | Anti-S IgG1 bisection       | -0.41    | 0.36    | 0.94             |
| AstraZeneca       | Seroconversion       | Female | Age  | Anti-S IgG1 fucosylation    | 0        | 1.00    | 1.00             |
| AstraZeneca       | Seroconversion       | Female | Age  | Anti-S IgG1 galactosylation | 0.19     | 0.69    | 1.00             |
| AstraZeneca       | Seroconversion       | Female | Age  | Anti-S IgG1 sialylation     | 0.52     | 0.23    | 0.80             |
| AstraZeneca       | Seroconversion       | Female | Age  | ELISA Anti-S                | 0.19     | 0.69    | 1.00             |
| AstraZeneca       | Seroconversion       | Male   | Age  | Anti-S IgG1 bisection       | -1       | 1.00    | 1.00             |
| AstraZeneca       | Seroconversion       | Male   | Age  | Anti-S IgG1 fucosylation    | 1        | 1.00    | 1.00             |
| AstraZeneca       | Seroconversion       | Male   | Age  | Anti-S IgG1 galactosylation | -1       | 1.00    | 1.00             |
| AstraZeneca       | Seroconversion       | Male   | Age  | Anti-S IgG1 sialylation     | 1        | 1.00    | 1.00             |
| AstraZeneca       | Seroconversion       | Male   | Age  | ELISA Anti-S                | 1        | 1.00    | 1.00             |
| Janssen           | Seroconversion       | Female | Age  | Anti-S IgG1 bisection       | -0.23    | 0.35    | 0.94             |
| Janssen           | Seroconversion       | Female | Age  | Anti-S IgG1 fucosylation    | -0.4     | 0.10    | 0.66             |
| Janssen           | Seroconversion       | Female | Age  | Anti-S IgG1 galactosylation | -0.46    | 0.06    | 0.56             |
| Janssen           | Seroconversion       | Female | Age  | Anti-S IgG1 sialylation     | -0.32    | 0.20    | 0.77             |
| Janssen           | Seroconversion       | Female | Age  | ELISA Anti-S                | -0.36    | 0.14    | 0.66             |
| Janssen           | Seroconversion       | Male   | Age  | Anti-S IgG1 bisection       | 1.40E-04 | 1.00    | 1.00             |
| Janssen           | Seroconversion       | Male   | Age  | Anti-S IgG1 fucosylation    | -0.1     | 0.56    | 0.94             |
| Janssen           | Seroconversion       | Male   | Age  | Anti-S IgG1 galactosylation | -0.1     | 0.56    | 0.94             |
| Janssen           | Seroconversion       | Male   | Age  | Anti-S IgG1 sialylation     | 0.11     | 0.52    | 0.94             |
| Janssen           | Seroconversion       | Male   | Age  | ELISA Anti-S                | -0.22    | 0.21    | 0.77             |
| Moderna           | Seroconversion       | Female | Age  | Anti-S IgG1 bisection       | 0.1      | 0.87    | 1.00             |
| Moderna           | Seroconversion       | Female | Age  | Anti-S IgG1 fucosylation    | -0.56    | 0.32    | 0.94             |
| Moderna           | Seroconversion       | Female | Age  | Anti-S IgG1 galactosylation | 0.15     | 0.81    | 1.00             |
| Moderna           | Seroconversion       | Female | Age  | Anti-S IgG1 sialylation     | -0.21    | 0.74    | 1.00             |
| Moderna           | Seroconversion       | Female | Age  | ELISA Anti-S                | 0.36     | 0.55    | 0.94             |
| Pfizer            | Seroconversion       | Female | Age  | Anti-S IgG1 bisection       | -0.21    | 0.41    | 0.94             |
| Pfizer            | Seroconversion       | Female | Age  | Anti-S IgG1 fucosylation    | -0.15    | 0.56    | 0.94             |
| Pfizer            | Seroconversion       | Female | Age  | Anti-S IgG1 galactosylation | 0.1      | 0.70    | 1.00             |
| Pfizer            | Seroconversion       | Female | Age  | Anti-S IgG1 sialylation     | 0.18     | 0.49    | 0.94             |
| Pfizer            | Seroconversion       | Female | Age  | ELISA Anti-S                | -0.54    | 0.02    | 0.41             |
| Pfizer            | Seroconversion       | Male   | Age  | Anti-S IgG1 bisection       | 0.39     | 0.19    | 0.77             |
| Pfizer            | Seroconversion       | Male   | Age  | Anti-S IgG1 fucosylation    | 0.38     | 0.20    | 0.77             |
| Pfizer            | Seroconversion       | Male   | Age  | Anti-S IgG1 galactosylation | -0.28    | 0.35    | 0.94             |
| Pfizer            | Seroconversion       | Male   | Age  | Anti-S IgG1 sialylation     | -0.0055  | 0.99    | 1.00             |
| Pfizer            | Seroconversion       | Male   | Age  | ELISA Anti-S                | -0.64    | 0.02    | 0.36             |
| RUMC/BN           | Seroconversion       | Female | Age  | Anti-S IgG1 bisection       | 0.16     | 0.53    | 0.94             |
| RUMC/BN           | Seroconversion       | Female | Age  | Anti-S IgG1 fucosylation    | -0.17    | 0.51    | 0.94             |
| RUMC/BN           | Seroconversion       | Female | Age  | Anti-S IgG1 galactosylation | -0.085   | 0.75    | 1.00             |
| RUMC/BN           | Seroconversion       | Female | Age  | Anti-S IgG1 sialylation     | -0.16    | 0.55    | 0.94             |
| RUMC/BN           | Seroconversion       | Female | Age  | ELISA Anti-S                | -0.087   | 0.74    | 1.00             |
| RUMC/BN           | Seroconversion       | Male   | Age  | Anti-S IgG1 bisection       | -0.19    | 0.52    | 0.94             |
| RUMC/BN           | Seroconversion       | Male   | Age  | Anti-S IgG1 fucosylation    | -0.33    | 0.24    | 0.81             |
| RUMC/BN           | Seroconversion       | Male   | Age  | Anti-S IgG1 galactosylation | -0.07    | 0.81    | 1.00             |
| RUMC/BN           | Seroconversion       | Male   | Age  | Anti-S IgG1 sialylation     | 0.062    | 0.83    | 1.00             |
| RUMC/BN           | Seroconversion       | Male   | Age  | ELISA Anti-S                | -0.24    | 0.41    | 0.94             |
| AstraZeneca       | 2 weeks post-booster | Female | Age  | Anti-S IgG1 bisection       | -0.43    | 0.39    | 0.94             |
| AstraZeneca       | 2 weeks post-booster | Female | Age  | Anti-S IgG1 fucosylation    | -0.75    | 0.08    | 0.61             |
| AstraZeneca       | 2 weeks post-booster | Female | Age  | Anti-S IgG1 galactosylation | 0        | 1.00    | 1.00             |
| AstraZeneca       | 2 weeks post-booster | Female | Age  | Anti-S IgG1 sialylation     | 0.29     | 0.58    | 0.94             |
| AstraZeneca       | 2 weeks post-booster | Female | Age  | ELISA Anti-S                | 0.058    | 0.91    | 1.00             |
| AstraZeneca       | 2 weeks post-booster | Male   | Age  | Anti-S IgG1 bisection       | -1       | 1.00    | 1.00             |
| AstraZeneca       | 2 weeks post-booster | Male   | Age  | Anti-S IgG1 fucosylation    | -1       | 1.00    | 1.00             |
| AstraZeneca       | 2 weeks post-booster | Male   | Age  | Anti-S IgG1 galactosylation | 1        | 1.00    | 1.00             |
| AstraZeneca       | 2 weeks post-booster | Male   | Age  | Anti-S IgG1 sialylation     | 1        | 1.00    | 1.00             |
| AstraZeneca       | 2 weeks post-booster | Male   | Age  | ELISA Anti-S                | 1        | 1.00    | 1.00             |
| Janssen (1 dose)  | 2 weeks post-booster | Female | Age  | Anti-S IgG1 bisection       | -0.28    | 0.37    | 0.94             |
| Janssen (1 dose)  | 2 weeks post-booster | Female | Age  | Anti-S IgG1 fucosylation    | -0.22    | 0.49    | 0.94             |
| Janssen (1 dose)  | 2 weeks post-booster | Female | Age  | Anti-S IgG1 galactosylation | -0.39    | 0.22    | 0.77             |
| Janssen (1 dose)  | 2 weeks post-booster | Female | Age  | Anti-S IgG1 sialylation     | -0.29    | 0.36    | 0.94             |
| Janssen (1 dose)  | 2 weeks post-booster | Female | Age  | ELISA Anti-S                | -0.49    | 0.11    | 0.66             |
| Janssen (1 dose)  | 2 weeks post-booster | Male   | Age  | Anti-S IgG1 bisection       | -0.13    | 0.57    | 0.94             |
| Janssen (1 dose)  | 2 weeks post-booster | Male   | Age  | Anti-S IgG1 fucosylation    | 0.34     | 0.12    | 0.66             |
| Janssen (1 dose)  | 2 weeks post-booster | Male   | Age  | Anti-S IgG1 galactosylation | 0.018    | 0.94    | 1.00             |
| Janssen (1 dose)  | 2 weeks post-booster | Male   | Age  | Anti-S IgG1 sialylation     | 0.0057   | 0.98    | 1.00             |
| Janssen (1 dose)  | 2 weeks post-booster | Male   | Age  | ELISA Anti-S                | -0.37    | 0.09    | 0.61             |
| Janssen (2 doses) | 2 weeks post-booster | Female | Age  | Anti-S IgG1 bisection       | -0.31    | 0.36    | 0.94             |
| Janssen (2 doses) | 2 weeks post-booster | Female | Age  | Anti-S IgG1 fucosylation    | 0.6      | 0.06    | 0.56             |
| Janssen (2 doses) | 2 weeks post-booster | Female | Age  | Anti-S IgG1 galactosylation | -0.57    | 0.07    | 0.61             |
| Janssen (2 doses) | 2 weeks post-booster | Female | Age  | Anti-S IgG1 sialylation     | -0.43    | 0.19    | 0.77             |
| Janssen (2 doses) | 2 weeks post-booster | Female | Age  | ELISA Anti-S                | -0.24    | 0.49    | 0.94             |
| Janssen (2 doses) | 2 weeks post-booster | Male   | Age  | Anti-S IgG1 bisection       | 0.12     | 0.56    | 0.94             |
| Janssen (2 doses) | 2 weeks post-booster | Male   | Age  | Anti-S IgG1 fucosylation    | 0.14     | 0.49    | 0.94             |
| Janssen (2 doses) | 2 weeks post-booster | Male   | Age  | Anti-S IgG1 galactosylation | -0.25    | 0.20    | 0.77             |
| Janssen (2 doses) | 2 weeks post-booster | Male   | Age  | Anti-S IgG1 sialylation     | -0.3     | 0.12    | 0.66             |
| Janssen (2 doses) | 2 weeks post-booster | Male   | Age  | ELISA Anti-S                | -0.34    | 0.09    | 0.61             |
| Moderna           | 2 weeks post-booster | Female | Age  | Anti-S IgG1 bisection       | 0.15     | 0.81    | 1.00             |
| Moderna           | 2 weeks post-booster | Female | Age  | Anti-S IgG1 fucosylation    | -0.46    | 0.43    | 0.94             |

|         |                      |        |     |                             |         |      |      |
|---------|----------------------|--------|-----|-----------------------------|---------|------|------|
| Moderna | 2 weeks post-booster | Female | Age | Anti-S IgG1 galactosylation | -0.15   | 0.81 | 1.00 |
| Moderna | 2 weeks post-booster | Female | Age | Anti-S IgG1 sialylation     | -0.56   | 0.32 | 0.94 |
| Moderna | 2 weeks post-booster | Female | Age | ELISA Anti-S                | 0.62    | 0.27 | 0.87 |
| Pfizer  | 2 weeks post-booster | Female | Age | Anti-S IgG1 bisection       | -1      | 1.00 | 1.00 |
| Pfizer  | 2 weeks post-booster | Female | Age | Anti-S IgG1 fucosylation    | -1      | 1.00 | 1.00 |
| Pfizer  | 2 weeks post-booster | Female | Age | Anti-S IgG1 galactosylation | -1      | 1.00 | 1.00 |
| Pfizer  | 2 weeks post-booster | Female | Age | Anti-S IgG1 sialylation     | -1      | 1.00 | 1.00 |
| Pfizer  | 2 weeks post-booster | Female | Age | ELISA Anti-S                | -1      | 1.00 | 1.00 |
| Pfizer  | 2 weeks post-booster | Male   | Age | Anti-S IgG1 bisection       | 0.54    | 0.17 | 0.77 |
| Pfizer  | 2 weeks post-booster | Male   | Age | Anti-S IgG1 fucosylation    | -0.3    | 0.47 | 0.94 |
| Pfizer  | 2 weeks post-booster | Male   | Age | Anti-S IgG1 galactosylation | -0.34   | 0.42 | 0.94 |
| Pfizer  | 2 weeks post-booster | Male   | Age | Anti-S IgG1 sialylation     | -0.29   | 0.49 | 0.94 |
| Pfizer  | 2 weeks post-booster | Male   | Age | ELISA Anti-S                | -0.18   | 0.67 | 1.00 |
| RUMC/BN | 2 weeks post-booster | Female | Age | Anti-S IgG1 bisection       | 0.19    | 0.48 | 0.94 |
| RUMC/BN | 2 weeks post-booster | Female | Age | Anti-S IgG1 fucosylation    | 0.038   | 0.89 | 1.00 |
| RUMC/BN | 2 weeks post-booster | Female | Age | Anti-S IgG1 galactosylation | -0.43   | 0.08 | 0.61 |
| RUMC/BN | 2 weeks post-booster | Female | Age | Anti-S IgG1 sialylation     | -0.38   | 0.13 | 0.66 |
| RUMC/BN | 2 weeks post-booster | Female | Age | ELISA Anti-S                | -0.011  | 0.97 | 1.00 |
| RUMC/BN | 2 weeks post-booster | Male   | Age | Anti-S IgG1 bisection       | -0.017  | 0.96 | 1.00 |
| RUMC/BN | 2 weeks post-booster | Male   | Age | Anti-S IgG1 fucosylation    | -0.0083 | 0.98 | 1.00 |
| RUMC/BN | 2 weeks post-booster | Male   | Age | Anti-S IgG1 galactosylation | -0.46   | 0.11 | 0.66 |
| RUMC/BN | 2 weeks post-booster | Male   | Age | Anti-S IgG1 sialylation     | -0.56   | 0.05 | 0.56 |
| RUMC/BN | 2 weeks post-booster | Male   | Age | ELISA Anti-S                | 0.14    | 0.65 | 1.00 |

**Table S9. IgG1 glycopeptides included in the final analyte list.**

| Glycan composition | Alternative nomenclature | $[M+2H]^{2+}$ | $[M+3H]^{3+}$ | Proposed structure |
|--------------------|--------------------------|---------------|---------------|--------------------|
| H3N4F1             | G0F                      | 1317.527      | 878.687       |                    |
| H4N4               | G1                       | 1325.524      | 884.018       |                    |
| H4N4F1             | G1F                      | 1398.553      | 932.704       |                    |
| H5N4               | G2                       | 1406.550      | 938.036       |                    |
| H5N4F1             | G2F                      | 1479.579      | 986.722       |                    |
| H5N4S1             | G2S                      | 1552.098155   | 1035.068      |                    |
| H5N5F1S1           | G2FNS                    | 1726.667      | 1151.447      |                    |
| H5N4F1S2           | G2FS2                    | 1770.675      | 1180.786      |                    |
| H4N5F1             | G1FN                     | 1000.398      | 1500.093      |                    |
| H4N4F1S1           | G1FS                     | 1029.736224   | 1544.101      |                    |
| H5N5F1             | G2FN                     | 1054.415      | 1581.119      |                    |
| H5N4F1S1           | G2FS                     | 1083.753832   | 1625.127      |                    |



**Table S10. Description and calculation of IgG1 glycosylation traits.** H: hexose, N: *N*-acetylhexosamine, F: fucose, S: *N*-acetylneuraminic (sialic) acid.

|                             | <b>Description</b>                                                     | <b>Formula</b>                                                                                                                                                    |
|-----------------------------|------------------------------------------------------------------------|-------------------------------------------------------------------------------------------------------------------------------------------------------------------|
| <b>IgG1 bisection</b>       | <i>N</i> -glycans carrying a bisected <i>N</i> -acetylglucosamine      | $( H5N5F1S1 + H4N5F1 + H5N5F1 )$<br>/ sum of all IgG1 glycopeptides                                                                                               |
| <b>IgG1 galactosylation</b> | <i>N</i> -glycans carrying galactose(s)                                | $( 1/2 * ( H4N4 + H4N4F1 + H4N5F1 + H4N4F1S1 )$<br>$+ 2/2 * ( H5N4 + H5N4F1 + H5N4S1 + H5N5F1S1 + H5N4F1S2 + H5N5F1 + H5N4F1S1 ) )$<br>/ sum of all glycopeptides |
| <b>IgG1 sialylation</b>     | <i>N</i> -glycans carrying <i>N</i> -acetylneuraminic (sialic) acid(s) | $( 1/2 * ( H5N4S1 + H5N5F1S1 + H4N4F1S1 )$<br>$+ 2/2 * H5N4F1S2 )$<br>/ sum of all IgG1 glycopeptides                                                             |
| <b>IgG1 fucosylation</b>    | <i>N</i> -glycans carrying a core fucose                               | $( H3N4F1 + H4N4F1 + H5N4F1 + H5N5F1S1 + H5N4F1S2 + H4N5F1 + H4N4F1S1 + H5N5F1S1 + H5N4F1S1 )$<br>/ sum of all IgG1 glycopeptides                                 |
